1 **Genetic variation associated with human longevity and Alzheimer’s disease risk**  
2 **act through microglia and oligodendrocyte cross-talk**

3

4 Andrew C. Graham<sup>1†</sup>, Eftychia Bellou<sup>2†</sup>, Janet C. Harwood<sup>3</sup>, Umran Yaman<sup>1</sup>, Meral  
5 Celikag<sup>1</sup>, Naciye Magusali<sup>1</sup>, Naiomi Rambarack<sup>1</sup>, Juan A. Botia<sup>4</sup>, Carlo Sala  
6 Frigerio<sup>1</sup>, John Hardy<sup>1,5</sup>, Valentina Escott-Price<sup>3\*</sup>, Dervis A. Salih<sup>1\*</sup>

7

8 **Affiliations:**

9 <sup>1</sup>UK Dementia Research Institute at UCL, Gower Street, London WC1E 6BT, UK

10 <sup>2</sup>Dementia Research Institute at Cardiff, Hadyn Ellis Building, Cardiff, CF24 4HQ,  
11 UK

12 <sup>3</sup>Division of Psychological Medicine and Clinical Neurosciences, Cardiff University,  
13 Hadyn Ellis Building, Cardiff, CF24 4HQ, UK

14 <sup>4</sup>Department of Information and Communications Engineering, Universidad de  
15 Murcia, Spain

16 <sup>5</sup>Department of Neurodegenerative Diseases, Institute of Neurology, UCL, 1  
17 Wakefield Street, London WC1N 1PJ, UK

18

19

20 †Joint primary authors

21 \*Joint senior authors

22

23 **\*Correspondence:** [dervis.salih@ucl.ac.uk](mailto:dervis.salih@ucl.ac.uk) (DAS), [escottpricev@cardiff.ac.uk](mailto:escottpricev@cardiff.ac.uk)  
24 (VEP)

25 **Running title: Genetic variation associated with lifespan and Alzheimer’s disease**

NOTE: This preprint reports new research that has not been certified by peer review and should not be used to guide clinical practice.

26

## 27 **Abstract**

28 Ageing is the greatest global healthcare challenge, as it underlies age-related  
29 functional decline and is the primary risk factor for a range of common diseases,  
30 including neurodegenerative conditions such as Alzheimer’s disease (AD). However,  
31 the molecular mechanisms defining chronological age versus biological age, and how  
32 these underlie AD pathogenesis, are not well understood. The objective of this study  
33 was to integrate common human genetic variation associated with human lifespan or  
34 AD from Genome-Wide Association Studies (GWAS) with co-expression networks  
35 altered with age in the central nervous system, to gain insights into the biological  
36 processes which connect ageing with AD and lifespan. Initially, we identified  
37 common genetic variation in the human population associated with lifespan and AD  
38 by performing a gene-based association study using GWAS data. We also identified  
39 preserved co-expression networks associated with age in the brains of C57BL/6J mice  
40 from bulk and single-cell RNA-sequencing (RNA-seq) data, and in the brains of  
41 humans from bulk RNA-seq data. We then intersected the human gene-level common  
42 variation with these co-expression networks, representing the different cell types and  
43 processes of the brain. We found that genetic variation associated with AD was  
44 enriched in both microglial and oligodendrocytic bulk RNA-seq gene networks,  
45 which show increased expression with ageing in the human hippocampus, in contrast  
46 to synaptic networks which decreased with age. Further, longevity-associated genetic  
47 variation was modestly enriched in a single-cell gene network expressed by  
48 homeostatic microglia. Finally, we performed a transcriptome-wide association study  
49 (TWAS), to identify and confirm new risk genes associated with ageing that show  
50 variant-dependent changes in gene expression. In addition to validating known  
51 ageing-related genes such as *APOE* and *FOXO3*, we found that Caspase 8 (*CASP8*)

52 and *APOC1* show genetic variation associated with longevity. We observed that  
53 variants contributing to ageing and AD balance different aspects of microglial  
54 function suggesting that ageing-related processes affect multiple cell types in the  
55 brain. Specifically, changes in homeostatic microglia are associated with lifespan, and  
56 allele-dependent expression changes in age-related genes control microglial activation  
57 and myelination influencing the risk of developing AD. We identified putative  
58 molecular drivers of these genetic networks, as well as module genes whose  
59 expression in relevant human tissues are significantly associated with AD-risk or  
60 longevity, and may drive “inflammaging.” Our study also shows allele-dependent  
61 expression changes with ageing for genes classically involved in neurodegeneration,  
62 including *MAPT* and *HTT*, and demonstrates that *PSENI* is a prominent member/hub  
63 of an age-dependent expression network. In conclusion, this work provides new  
64 insights into cellular processes associated with ageing in the brain, and how these may  
65 contribute to the resilience of the brain against ageing or AD-risk. Our findings have  
66 important implications for developing markers indicating the physiological age and  
67 pre-pathological state of the brain, and provide new targets for therapeutic  
68 intervention.

69

70

## 71 **Introduction**

72 Biological ageing is the decline of adult tissue function following development. The  
73 mammalian central nervous system (CNS), shows various impairments in function  
74 with age, such as impaired spatial memory, episodic memory, and executive  
75 function<sup>1-3</sup>. This decline in function has been linked to cellular changes in different  
76 brain regions, including modification of synaptic connections, and inflammatory  
77 changes<sup>3,4</sup>. Ageing is considered the primary risk factor for a number of  
78 neurodegenerative conditions including Alzheimer's disease (AD), however the  
79 molecular mechanisms linking ageing and AD are not well understood<sup>1,5,6</sup>. Therefore,  
80 understanding the mechanisms of biological ageing may not only facilitate combatting  
81 the widespread and growing morbidity caused by age-related CNS decline, but also  
82 provide insights into the onset and progression of age-dependent diseases, such as  
83 AD.

84

85 Model organisms have revealed important insights into genetic pathways which can  
86 dramatically alter organismal lifespan and healthspan when manipulated.  
87 Manipulating these pathways in humans is not trivial, but understanding the causes of  
88 ageing in specific tissues, such as the CNS, may enable more directed treatments with  
89 less side-effects<sup>3,5,7-9</sup>. Gene expression changes with ageing have been studied  
90 comprehensively in different tissues, including the brain. While these studies shed  
91 light on age-associated transcriptional changes, it is not clear which of the many  
92 altered pathways drive age-associated changes, and thus which pathways should be  
93 targeted by anti-ageing therapies that may also be capable of slowing age-dependent  
94 CNS-disorders. The use of genome-wide association studies (GWAS) has advanced  
95 our ability to identify genetic variation associated with human ageing and age-related



96 diseases, with the identification of genes such as *APOE* and *FOXO3* which are  
97 associated with ageing in some populations<sup>10,11</sup>. Genetic variation in these genes may  
98 underlie some of the differences in ageing between people that are long-lived versus  
99 those that live an average lifespan. However, these genes are often multi-functional,  
100 so how genetic variation modulates biological pathways of ageing are not clear.

101

102 Ageing affects all cell types in the brain from neurons to microglia and the supporting  
103 vasculature. Emerging data are also revealing prominent disruption of myelin occurs  
104 with ageing. Myelin is a layered lipid-rich membrane produced by oligodendrocytes  
105 which ensheaths neuronal axons, providing metabolic support and enabling fast  
106 propagation of action potentials. In mammals, significant age-related changes are  
107 observed in highly myelinated areas of the brain, known as white matter, starting from  
108 around 50 years of age in humans. These include hyperintensities seen by magnetic  
109 resonance imaging (MRI), as well as myelin unfolding and accumulation of  
110 multilamellar fragments seen by electron microscopy<sup>12-14</sup>. Myelin regeneration or  
111 remyelination occurs during ageing and injury. Indeed, axonal function can be  
112 restored via the proliferation and differentiation of oligodendrocyte precursor cells  
113 into mature oligodendrocytes that lay down new myelin at sites of lesions<sup>14,15</sup>.  
114 However, remyelination becomes impaired in the aged brain. Microglia are thought to  
115 play an important protective role in the remyelination process, by clearing  
116 degenerated myelin that accumulates during ageing and disease through phagocytosis,  
117 and by secretion of growth factors and cytokines to support oligodendrocyte  
118 maturation, and to remodel the extracellular matrix<sup>13,14,16,17</sup>. Recent work has shown  
119 that myelin disruption with ageing in rodents can drive accumulation of amyloid  
120 plaques, by entangling microglia, potentially contributing to AD pathogenesis<sup>18</sup>.

121 However, little is known about the genetic and molecular mechanisms leading to  
122 disruption of myelin with ageing, or its importance in determining healthspan of the  
123 brain and AD risk.

124

125 To better understand the age-dependent processes within the CNS that contribute to  
126 lifespan and AD pathogenesis, we used a four-step approach to identify biological  
127 pathways that are dysregulated with age, and are enriched for genes associated with  
128 longevity or AD risk. Firstly, we identified common human genetic variation  
129 associated with ageing or AD at the gene-based level by aggregating individual SNPs'  
130 significance and by testing the joint association of all SNPs in the gene accounting for  
131 linkage disequilibrium (LD) and number of SNPs per gene. Secondly, we overlaid this  
132 human genetic variation onto age-associated gene co-expression networks, generated  
133 from bulk and single-cell RNA-sequencing (scRNA-seq)-based transcriptomic  
134 profiling of the mouse hippocampus, a region which is thought to be central to both  
135 age-related cognitive decline and AD<sup>3,19</sup>. Thirdly, we tested for an enrichment of gene  
136 variants associated with ageing and AD in different co-expression networks which are  
137 dysregulated with age in the mouse and human hippocampus. We found a significant  
138 enrichment of gene variants associated with AD in human microglial and  
139 oligodendrocytic networks, whose expression was also significantly increased with  
140 age. Assessment of changes in co-expression modules with ageing at the single-cell  
141 level in microglia identified stark similarities to changes in young mice treated with  
142 cuprizone to induce demyelination, indicating that age-related demyelination may  
143 provide a link between these two AD-associated processes. Furthermore, we saw a  
144 modest but significant enrichment of genes associated with ageing in humans in a  
145 single-cell co-expression network, highly expressed by homeostatic microglia, which

146 is lost during ageing and demyelination. Finally, we performed a transcriptome-wide  
147 association study (TWAS), to identify and confirm new risk genes associated with  
148 longevity, and compared the results to the genes associated with AD in the recently  
149 published AD TWAS<sup>20</sup>. Our data suggest a hypothesis whereby potentially linked  
150 microglial and oligodendrocytic responses to ageing may modify AD risk, while the  
151 degree of age-dependent loss of homeostatic microglial functions may influence  
152 longevity. These findings may allow earlier tracking of disease progression, and  
153 provide new targets for AD prevention, as well as facilitation of healthy CNS ageing.  
154

## 155 **Results**

### 156 **Identification of genes harbouring common genetic variation associated with** 157 **longevity and AD**

158 We initially identified genes harbouring common genetic variants associated with  
159 lifespan to capture each gene's collective SNPs, even if a single SNP does not reach  
160 genome-wide significance, by performing a gene-based analysis with the summary  
161 statistics from a meta-analysis combining three different GWAS associated with  
162 lifespan<sup>10</sup>. Our gene-based analysis showed *APOC1* ( $P_{\text{FDR}} = 2.49\text{e-}63$ ), and *APOE*  
163 ( $P_{\text{FDR}} = 1.95\text{e-}46$ ), were the strongest genes associated with the measures of lifespan  
164 (top genes associated with lifespan are given in Supplementary Table 1,  $P_{\text{FDR}} < 0.01$ ).  
165 The results of a similar gene-based analysis on the data from the International  
166 Genomics of Alzheimer's Projects (IGAP)<sup>21</sup> to identify genes harbouring common  
167 genetic variation associated with AD risk are given in Supplementary Table 2 (top  
168 genes associated with AD,  $P_{\text{FDR}} < 0.01$ ).

169

### 170 **Transcriptional networks of oligodendrocytic and microglial genes are** 171 **associated with age in the mouse hippocampus**

172 We then sought to gain insights into which biological pathways contained the genes  
173 associated with longevity and AD (Supplementary Tables 1 and 2), while determining  
174 how these pathways are affected by ageing. To determine transcriptomic changes  
175 associated with ageing at the systems level, we performed weighted gene co-  
176 expression analysis (WGCNA)<sup>22</sup>, with an optimization for constructing more  
177 biologically meaningful co-expression networks<sup>23</sup>, to group genes which were co-  
178 expressed in the hippocampi of C57BL/6J wild-type mice at 2-18 months-of-age<sup>24</sup>.  
179 We identified eight co-expression modules whose expression was significantly

180 associated with age (Pearson's product-moment correlation with age, here and  
181 thereafter,  $R^2 > 0.4$ ,  $p < 0.01$ ; Fig. 1a), from more than 20 modules. Using cell-type  
182 enrichment analysis, we determined that the module with strongest correlation to age  
183 ( $R^2 = 0.93$ ,  $p < 0.001$ ), was heavily enriched for microglial genes (microglial module).  
184 A second module which significantly correlated with age ( $R^2 = 0.54$ ,  $p < 0.01$ ), was  
185 heavily enriched for oligodendrocytic genes (mouse oligodendrocytic module) (Fig.  
186 1b). Corresponding with their cell-type annotations, the mouse microglial module was  
187 significantly enriched for biological annotations associated with innate immunity,  
188 while the oligodendrocytic module was enriched for myelination and axon  
189 ensheathment (Fig. 1c, d).

190

191 Genes with the highest connectivity to other genes within a co-expression module are  
192 known as hub genes, and are postulated to drive the response of the entire  
193 network<sup>25,26</sup>. The mouse microglial module contained as hub genes, *Il33*, *Erbin*, *Sspn*,  
194 *Neat1*, and *Zc3hav1*, and also contained the canonical microglial genes *Trem2* and  
195 *ApoE* (Fig. 1c). The oligodendrocytic module included the hub genes: *Mobp*,  
196 *Tmem88b*, *Plp1*, *Plekhh1*, *Plekhhb1*, *Galnt6*, *Bcas1* and *Prr18* (Fig. 1d). Interestingly,  
197 while analysis of single-cell RNA-seq data determined that 14 of the 15 most-  
198 connected genes in the bulk microglial module were also detected by scRNA-seq of  
199 the mouse hippocampus at 3 and 24 months-of-age<sup>27</sup>, 8 of these genes were  
200 predominantly detected in oligodendrocytes, where they all showed elevated  
201 expression with age (Supplementary Fig. 1). Overall, these scRNA-seq findings  
202 indicate that while the microglial module is significantly enriched for microglial  
203 genes such as *ApoE* and *Trem2*, its hub genes are contributed by other cell types,  
204 disproportionately oligodendrocytes, including genes coding for signalling molecules

205 known to affect microglial function such as the interleukin *Il33* and complement  
206 component *C4b*<sup>28-30</sup>. This suggests age-related signalling from oligodendrocytes may  
207 trigger microglial activation in the aged hippocampus.

208

209 Since transcriptional changes in mice can be affected by many co-variates, such as  
210 mouse strain, husbandry conditions, diet, and technical variation due to RNA  
211 preparation, RNA-seq protocols and analysis pipeline, we then tested whether the age-  
212 dependent co-expression networks were preserved in other bulk RNA-seq datasets of  
213 wild-type mouse hippocampus or cortex at various ages from 13-126-weeks of age  
214 from three other labs, processed via a variety of pipelines<sup>31-33</sup>. We saw strong  
215 preservation of both the microglial and oligodendrocytic modules, with respect to  
216 gene expression connectivity and correlation to age in the different datasets (strong  
217 preservation,  $z.summary > 10$  for co-expression patterns between module genes;  
218 microglial module  $R^2$  with age  $>0.93$  and oligodendrocytic module  $R^2 > 0.58$  against  
219 two further query datasets; Supplementary Fig. 2). This provides evidence that the  
220 age-dependent co-expression networks are preserved between different mice, labs,  
221 and sequencing experiments.

222

### 223 **Single-cell RNA-seq changes of age-dependent gene expression**

224 Given that recent scRNA-seq studies have revealed that microglia respond  
225 heterogeneously to various challenges, we sought to determine age-dependent co-  
226 expression networks at the single-cell level, using scRNA-seq data generated from  
227 microglia isolated from male and female wild-type mice hippocampi at 3, 6, 12, and  
228 21 months-of-age (2 mice of each sex/age, pooled prior to sequencing) (data from  
229 Sala Frigerio *et al.*, 2019<sup>34</sup>). Previous analysis of this data identified 6 microglial

230 subpopulations: homeostatic microglia 1 and 2 (HM1 and HM2), which highly  
231 express genes associated with microglial homeostatic functions; cycling proliferating  
232 microglia (CPM), which express genes involved in the cell cycle; activated response  
233 microglia (ARM); interferon response microglia (IRM); and transiting microglia  
234 (TRM) which may be an intermediate state between homeostatic microglia and  
235 ARM<sup>34</sup>. We identified eight co-expression modules expressed by distinct microglial  
236 sub-populations in the mouse hippocampus (Fig. 2a). To reliably assess the age-  
237 related changes in expression of these modules in more replicates than those available  
238 in scRNA-seq data, we assessed these modules' dysregulation (using the mean  
239 expression of the core 100 genes with the highest connectivity) between independent  
240 replicates of microglia isolated from wild-type mice hippocampi at 2 and 16-18  
241 months-of-age, and profiled by bulk RNA-seq (data from O'Neil *et al.*, 2018<sup>35</sup>).

242

243 Six gene modules exhibited altered expression with age. A module of genes  
244 representing activated microglia exhibited strikingly increased expression with age  
245 (ARM-associated module,  $p = 1.2e-3$ , Student's *t*-test; Fig. 2a, b, c, d). This module  
246 was predominantly expressed by the ARM subpopulation of activated microglia,  
247 which are synonymous with the disease-associated microglia (DAM) subpopulations  
248 seen in AD mouse models<sup>34,36</sup>. Interestingly, this module's hub genes (*Spp1*, *Clec7a*,  
249 *Lilrb4a*; Fig. 3a) have been reported to mark microglia scavenging fragmented myelin  
250 in the corpus callosum, which also become more numerous with ageing<sup>13</sup>. This  
251 module is significantly enriched for biological annotations related to phagocytosis,  
252 cytokine production, and TYROBP signalling (Supplementary Fig. 3a). Another gene  
253 module consisting of interferon-stimulated genes was also increased with ageing  
254 (Interferon module,  $p = 8.0e-3$ , Student's *t*-test; Fig. 2f, and Fig. 3b), and was

255 associated with a distinct subpopulation of interferon responsive microglia, IRM, so  
256 was named the interferon module. This module is significantly enriched for biological  
257 annotations related to the interferon response (Supplementary Fig. 3b). A further  
258 module containing ribosomal genes, was more modestly increased with ageing  
259 (ribosomal module;  $p = 3.0e-2$ , Student's *t*-test, Fig. 2h and Supplementary Fig. 3). In  
260 contrast, a module strongly associated with a homeostatic subcluster, HM2, was  
261 decreased during ageing (HM2-associated module,  $p = 1.4e-5$ , Student's *t*-test; Fig. 2j  
262 and Fig. 3c). While a module associated with a different homeostatic subpopulation of  
263 microglia, HM1 (HM1-associated module,  $p = 8.7e-3$ , Student's *t*-test; Fig. 2l), and a  
264 module associated with TGF- $\beta$  signalling (TGF- $\beta$  module,  $p = 4.0e-4$ , Student's *t*-test;  
265 Fig. 2n and Supplementary Fig. 3), were more modestly decreased during ageing.  
266 Finally, modules containing phagocytosis and lysosomal genes (phagolysosomal  
267 module; Fig. 3d and Supplementary Fig. 3), or associated with the CPM cluster  
268 (CPM-associated module), were not significantly altered during ageing ( $p > 0.05$ ,  
269 Student's *t*-test).

270

271 To gain further insights into how these modules relate to microglial activation, we  
272 used semi-supervised Pseudotime analysis to order cells by their expression of genes  
273 which nominally significantly differ ( $p < 0.05$ ) between subpopulations (Fig. 2b),  
274 using Monocle 2<sup>37,38</sup>. We saw that the HM1 microglial subpopulation could be  
275 considered as the root state, and then the ARM and IRM populations acted as the  
276 endpoint of distinct activation trajectories, with HM2 and TRM as intermediate states.  
277 We saw that the ARM trajectory was defined by increased expression of the ARM-  
278 associated module of genes, although some cells in the IRM trajectory also expressed  
279 this gene module (Fig. 2c). The ribosomal module was also upregulated along the



280 ARM trajectory (Fig. 2g). While the IRM trajectory was defined by increased  
281 expression of the interferon module (Fig. 2e). In contrast, expression of the HM1-  
282 /HM2-associated, and TGF- $\beta$ -associated modules was highest in the root homeostatic  
283 state and decreased along both activation trajectories (Fig. 2i, k, m). Collectively these  
284 data show that microglial transcription programs associated with states considered to  
285 be activated are increased with age in the mouse hippocampus, and transcriptional  
286 signatures associated with homeostatic functions are decreased with age.

287

### 288 **Single-cell RNA-seq signatures of microglia associated with ageing resemble the** 289 **changes seen with demyelination**

290 Due to the enrichment of oligodendrocytic hub genes in our bulk microglial module,  
291 we then sought to gain further insight into whether the microglial responses during  
292 ageing seen in our single-cell analysis may be influenced by interactions with  
293 oligodendrocytes. Demyelination is a major feature of oligodendrocyte ageing in the  
294 mouse hippocampus<sup>39</sup>. Therefore, we examined how these age-dependent scRNA-seq  
295 modules were affected when microglia were exposed to demyelination in young mice,  
296 following feeding with cuprizone (data from Ref<sup>40</sup>). Interestingly, we found that the  
297 co-expression of genes within our age-associated microglial modules (Fig. 2 and 3)  
298 were strongly preserved in young mice fed a demyelinating diet (Fig. 4a), indicating  
299 that these genes were also co-expressed in these mice exhibiting demyelination.  
300 Looking again at our age-dependent modules of interest (Fig. 2 and 3), we found that  
301 the average expression of their 100 most connected genes showed the same change  
302 with demyelination as they showed with ageing. The ARM-associated module (ARM  
303 population) was increased after both 5-weeks ( $p = 6.7e-5$ , Dunnett's test), and 12-  
304 weeks ( $p = 9.3e-6$ , Dunnett's test) of a demyelinating cuprizone diet, mirroring the

305 changes seen with ageing (Fig. 4b). The average expression of core interferon-  
306 response module genes was increased following 5-weeks ( $p = 4.0e-3$ , Dunnett's test)  
307 of a demyelinating cuprizone diet, as we saw during ageing, although this subsided  
308 after 12-weeks of the cuprizone diet ( $p = 2.4e-1$ , Dunnett's test; Fig. 4c). While the  
309 ribosomal module was more modestly elevated following 5- and 12-weeks on the  
310 cuprizone diet (5-weeks:  $p = 2.9e-3$ ; 12-weeks:  $p = 2.6e-2$ ; Dunnett's tests; Fig. 4d).  
311 In contrast, the average expression of core genes in the HM2-associated, HM1-  
312 associated, and TGF- $\beta$  modules were decreased after both 5-weeks (HM2,  $p = 1.3e-2$ ;  
313 HM1,  $p = 3.4e-2$ ; TGF- $\beta$ ,  $p = 1.2e-3$ ; Dunnett's tests) and 12-weeks (HM2,  $p = 2.9e-$   
314  $4$ ; HM1,  $p = 7.8e-3$ ; TGF- $\beta$ ,  $p = 6.0e-4$ ; Dunnett's tests) (Fig. 4e, f, g) of a  
315 demyelinating cuprizone diet, mirroring the repression of these modules during  
316 ageing (Fig. 2). Overall, these data provide evidence that the transcriptional  
317 programmes we identified were similarly changed in microglia during ageing and in  
318 response to the breakdown of myelin in young mice.

319

### 320 **Transcriptional networks of oligodendrocytic and microglial genes are** 321 **associated with age in the human hippocampus**

322 As ageing in mice may not reflect ageing in humans<sup>41,42</sup>, we then performed a  
323 comparable analysis of bulk RNA-seq data from the non-diseased hippocampi of 196  
324 cognitively normal individuals from the GTEx consortium<sup>43</sup>. This analysis produced  
325 several co-expression modules significantly correlated to age (Fig. 5a). Strikingly, the  
326 module most correlated to age was enriched for microglial genes ( $R^2 = 0.73$ ,  $p <$   
327  $0.001$ ; Hu\_Microglial module), as was the case in mice, with genes such as *TYROBP*,  
328 *SYK* and *CD53* presenting as hub genes (Fig. 5a, b). Additionally, expression of an  
329 oligodendrocytic gene enriched module ( $R^2 = 0.58$ ,  $p < 0.001$ ; Hu\_Oligodendrocyte

330 module) was also significantly positively associated with age, with genes such as  
331 *ENPP2*, *CNTN2*, *PSENI*, *SLC44A1* and *CYP27A1* presenting as hub genes (Fig. 5a,  
332 c). However, despite this broad inter-species similarity, there were differences in the  
333 gene constituents of these modules compared to their mouse counterparts, as the  
334 human and mouse microglial, and oligodendrocytic co-expression modules showed  
335 only moderate preservation of their gene co-expression patterns in the mouse data  
336 (Fig. 5d). Correspondingly, 42 genes in the human microglial module have  
337 orthologues in the mouse microglial module ( $p = 3.4e-26$  overlap, Fisher's Exact  
338 Test), and 90 genes in the human oligodendrocyte module have orthologues in the  
339 mouse oligodendrocyte module ( $p = 1.6e-75$  overlap, Fisher's Exact Test). Genes  
340 unique to the mouse age-dependent microglial network included *B2m*, *Cst7*, *Pik3cg*  
341 and *Ccl4*, and also *Il33* which is expressed mostly by oligodendrocytes and is part of  
342 the age-dependent module because it shows expression changes very similar to the  
343 microglial genes. In contrast, genes unique to the human age-dependent microglial  
344 network included *ABI3*, *ALOX5AP*, *CIQA-C*, *CD68*, *CD74*, *CSF1R*, *FCER1G*,  
345 *ITGAM*, *MRC1*, *MS4A6A*, *P2RY12*, *RUNX1*, *SAMSN1*, *SPI1*, *STAT6*, *SYK* and  
346 *TYROBP*. To gain further insights into how the age-dependent microglial response is  
347 different between humans and mice, we investigated biological annotations associated  
348 with the age-dependent genes unique to either mouse or human using the Gprofiler2 R  
349 package<sup>44</sup>. The age-dependent genes unique to mouse were associated with antigen  
350 presentation involving the major histocompatibility complex (MHC)(Supplementary  
351 Fig. 4a). Whereas age-dependent genes unique to humans were associated with  
352 leukocyte activation, cytokine production and T cell activation (Supplementary Fig.  
353 4b). Therefore, the human and mouse age-related gene networks are overlapping, but  
354 each organism has its own distinct components of the network and so some of the

355 human age-related processes which modulate AD risk and longevity in humans are  
356 not seen in mice.

357

### 358 **Microglial and oligodendrocytic gene networks are enriched for AD risk genes**

359 Our previous study testing for enrichment of common human gene variants in a co-  
360 expression network associated with amyloid plaques demonstrated that genetic risk  
361 for AD is substantially encoded by genes expressed during the response of microglia  
362 to these plaques<sup>24</sup>. Therefore, to investigate whether our age-dependent co-expression  
363 networks were connected to AD, we tested the mouse and human age-dependent bulk  
364 RNA-seq co-expression networks for enrichment of genes, or mouse orthologues of  
365 human genes, significantly associated with AD (top genes associated with AD are  
366 given in Supplementary Table 2,  $P_{FDR} < 0.01$ ). Enrichment analyses were performed  
367 by comparing the number of overlapping genes in our gene-sets with randomly  
368 sampled gene-sets matched for LD, gene size and the number of genes in a set. We  
369 saw no significant enrichment of common human AD-associated genes in the age-  
370 dependent mouse networks from bulk RNA-seq (Fig. 1 and Table 1). In contrast, we  
371 saw a significant enrichment of overlapping genes associated with AD in both the  
372 age-dependent human microglial network (enrichment  $p = 1e-05$ , bootstrap-based  
373 test) and oligodendrocytic network (enrichment  $p = 0.033$ , bootstrap-based test) (Fig.  
374 5b, c, and Table 1). The genes driving the enrichment (gene-based  $p$ -values  $< 0.01$ ) of  
375 the microglial module are known AD-associated risk genes (*CD33*, *GAL3ST4*, *HLA-*  
376 *DRB1*, *INPP5D*, *MS4A4A*, *SPI1*, *TREM2*), and putative risk genes (*ITGAM*, *LAPTM5*  
377 and *LILRB4*)<sup>24</sup> (Fig. 5 and Supplementary Table 3). We also observed genes with  
378 gene-based  $p$ -values  $< 0.01$  not before linked to AD, which are likely to contribute to  
379 AD risk when combined with their co-expression with other genes enriched for AD

380 risk, namely, *APOC2*, *ARHGAP45*, *ATP8B4*, *CMTM7*, *COX7A1*, *DOCK3*, *MARCO*,  
381 *MLPH*, *NOP2*, *PCED1B* and *TMC8* (Table 1; Supplementary Table 3). Therefore, the  
382 age-dependent microglial genetic network identified here both highlights a role for  
383 microglial-associated age-related changes in determining AD risk, and predicts new  
384 putative risk genes for AD.

385

386 None of the genes within the human oligodendrocytic module had previously been  
387 identified as GWAS hits for AD risk. Nevertheless, *CLASRP* meets genome-wide  
388 significance in our analysis ( $P_{FDR} = 1.50e-10$ ), highlighting the benefit of our gene-  
389 based association analysis, and indicating a potential oligodendrocytic role for this  
390 gene in the human hippocampus. *CLASRP* is in the same region as *APOE*, but is  
391 included here as a gene of interest because it shows age-dependent expression  
392 changes. Moreover, the large number of co-expressed genes (29 genes) containing  
393 genetic variation associated with AD below our threshold (gene-based  $p < 0.01$ ; Table  
394 1; Supplementary Table 4), indicates that genetic variation which influences  
395 myelination during ageing may play a role in AD pathogenesis.

396

### 397 **A homeostatic microglial gene network is enriched with common gene variants** 398 **associated with longevity**

399 To determine which specific microglial transcriptional programs are particularly  
400 associated with AD and longevity, we repeated our assessment of enrichment for  
401 common genetic variation associated with these traits, using modules from our  
402 scRNA-seq analysis (Fig. 3). Comparing the number of overlapping genes from our  
403 modules to bootstrapped modules containing the same number of genes randomly  
404 selected from those reliably detected from this dataset (to account for the relative

405 enrichment of microglia-expressed genes with these traits), we observed a trend for  
406 enrichment of genes associated with AD within the genes present in the ARM- and  
407 phagolysosomal-associated modules (Fig. 3 and Table 1; Supplementary Tables 5 and  
408 6). Furthermore, our analysis suggests that the HM2-associated module is  
409 significantly, but modestly, enriched for genetic variation associated with longevity  
410 (enrichment  $p = 0.032$ , bootstrap-based test) (Table 2; Supplementary Table 7). This  
411 module contains the mouse orthologue of *FOXO3* and *ATXN2*, which have previously  
412 been linked to longevity by GWAS studies, as well as cognitive decline (*FOXO3*),  
413 and late-onset Parkinson's disease and Spinocerebellar Ataxia 2<sup>10,45,46</sup>. This  
414 homeostatic microglial module also includes the mouse orthologue of *CASP8*, which  
415 acts as a molecular switch to control cell death via apoptosis, necroptosis and  
416 pyroptosis<sup>47</sup>. Importantly, the longevity-associated role of these genes has not  
417 previously been linked to microglia.

418

419 **Transcriptome-wide association study highlights the new genes associated with**  
420 **AD risk and genes expressed by homeostatic microglia that are associated with**  
421 **longevity**

422 To investigate genetic variation associated with longevity using an independent  
423 approach, we performed a TWAS, to identify genes in which a change in expression  
424 is associated with genetic contribution to longevity. Data are not available to perform  
425 this analysis with microglia, but since peripheral monocytes differentiate into  
426 microglia-like macrophages within the CNS, we used expression data from naïve  
427 (CD14) and induced monocytes (LPS and IFN-gamma) from the Fairfax dataset<sup>48</sup>, as  
428 previously performed for AD<sup>20</sup>. In addition, we used expression data from the  
429 Genotype-Tissue Expression (GTEx) Project including the brain and hippocampus

430 <sup>43,49</sup>, whole blood from the young Finns study (YFS)<sup>50</sup>, and the Netherlands twin  
431 register peripheral blood (NTR)<sup>51</sup>. These datasets include sorted CD14+ve myeloid  
432 cells, whole blood, and hippocampus, which can shed light on myeloid cell  
433 transcription. Using the AD TWAS, this approach confirmed the importance of  
434 known AD risk genes such as *APOE*, *BINI*, *CD33*, *CRI*, *MS444A*, *OAS1* and *SPII*  
435 (extracted from the Supplementary data of Harwood *et al.* (2021)<sup>20</sup>, and summarised  
436 in Supplementary Table 8). Furthermore, this approach also identified new risk genes  
437 not previously associated with AD, such as *GEMIN7* (frontal cortex,  $p = 2.17e-11$ ,  $Z$   
438  $= 6.69$ ) and *MTCH2* (frontal cortex,  $p = 2.44e-10$ ,  $Z = -6.33$ ) (extracted from the  
439 Supplementary data of Harwood *et al.* (2021)<sup>20</sup> and summarised in Supplementary  
440 Table 8). *GEMIN7* is in the same region as *APOE*, but is included here as a gene of  
441 interest because it shows transcription-dependent association. Using the longevity  
442 GWAS, we noted known genes showing variation associated with longevity including  
443 *FOXO3*, where reduced *FOXO3* expression was significantly associated with  
444 longevity in whole blood (Fig. 6 and Supplementary Fig. 5). Additionally, we  
445 identified several genes associated with altered expression and longevity, such as  
446 *ADD1*, a cytoskeletal protein which achieved genome-wide significance in the CD14-  
447 positive monocyte cell dataset, with increased expression being linked to longevity  
448 (Fig. 6 and Supplementary Fig. 5). *CASP8* also achieved genome-wide significance in  
449 cortical tissue (frontal cortex,  $p = 3.71e-08$ ,  $Z = -5.50$ ; Fig. 6 and Supplementary  
450 Table 9), and blood, with decreased expression linked to longevity (Supplementary  
451 Fig. 5). Cathepsin S (*CTSS*) was also significant in the putamen, with increased  
452 expression linked to longevity (Supplementary Fig. 5 and Supplementary Table 9).  
453 This approach has highlighted new genes associated with longevity ( $p < 0.01$  and  $Z >$   
454  $3.0$  or  $< -3.0$ ), of which around half are thought to interact via Ingenuity pathway

455 analysis including *APOE*, *CASP8*, *CTSB*, *CTSH*, *CTSS*, *LIPA*, *LPL*, *NPCI* and *TUFM*  
456 (Fig. 7 and Supplementary Table 9). Given that *FOXO3*, *ADD1* and *CASP8* are  
457 expressed by homeostatic microglia, and that genetic variation associated with  
458 longevity is enriched in genes expressed by homeostatic microglia, our collective data  
459 suggest a model whereby genes associated with longevity are involved in the  
460 homeostatic functions of microglia, and perhaps other innate immune cells. If these  
461 innate immune cells escape this state of homeostasis by activating stimuli such as  
462 amyloid pathology and age-dependent myelin fragmentation, then genes associated  
463 with AD determine how microglia are activated and how they respond to these large  
464 disturbances in homeostasis (Fig. 8).  
465



466 **Discussion**

467 **Human common gene-level variation associated with AD is enriched in age-**  
468 **dependent oligodendrocytic and microglial co-expression networks**

469 Human ageing and AD are so entwined due to numerous interconnected co-  
470 morbidities, such as vascular disease, and the long pre-symptomatic period of AD  
471 highlights the challenge of studying each phenomenon independently. A clear clue  
472 that links ageing and AD is that traditional GWAS have repeatedly demonstrated that  
473 *APOE* is the top genetic risk factor contributing to both late-onset AD<sup>21</sup> and  
474 longevity<sup>10,11</sup>, with the  $\epsilon$ 4 isoform being detrimental in both contexts, showing the  
475 highest risk for AD (with earlier age of onset among the late-onset AD cases)<sup>52</sup>, and  
476 the lowest odds for longevity. Additionally, longevity shows a significant negative  
477 genetic correlation with AD<sup>10</sup>. However, the molecular mechanisms linking AD and  
478 ageing are poorly understood. To gain new insights into mechanisms linking ageing  
479 and AD, we have combined genetic association in human GWAS data with  
480 transcriptomic analyses of ageing in the human and mouse hippocampus, aiming to  
481 identify biological pathways and cell types which are both altered during ageing, and  
482 associated with longevity and/or AD-risk. We show that the expression of separate  
483 gene modules associated with microglia and oligodendrocytes are strongly positively  
484 correlated to age in both species. These age-dependent microglial and  
485 oligodendrocytic co-expression networks in mice show modest preservation in  
486 humans. Notably, only the human modules were significantly enriched for genetic  
487 variation associated with AD risk. This implies that microglial and oligodendrocytic  
488 ageing may contribute to AD risk, where genetic variants which alter the response of  
489 these cell-types to ageing in the human hippocampus may modulate the onset of AD  
490 pathogenesis. While the influence of microglia on AD risk is well known<sup>53</sup>, the

491 relationship between oligodendrocytes and myelination on AD risk is less well  
492 understood. Although it has been previously suggested that individuals with white  
493 matter abnormalities show a higher risk of dementia<sup>54</sup>, and disruption of the  
494 expression and epigenetic marks of oligodendrocytic genes is seen in AD and  
495 ageing<sup>15,55–59</sup>.

496

497 We highlight new genes not previously reported to be associated with AD, and show  
498 that they may have a role in age-related responses. Although, we cannot discount the  
499 possibility that these modules are associated with AD due to the same genes being  
500 involved in the response to both A $\beta$ -associated cellular damage during the AD  
501 process, and in the cellular response to ageing. The hub genes for these modules, and  
502 transcription factors whose targets are enriched within these modules, are putative  
503 drivers, and potential targets to influence these AD-related modules.

504

505 We identified gene expression networks that were significantly associated with age  
506 from different bulk and scRNA-seq datasets representing distinct cell-types and  
507 biological processes using wild-type mice to reduce the confounds of co-morbidities  
508 associated with human tissue. We find that common genetic variation associated with  
509 longevity is modestly enriched in genes expressed by homeostatic microglia.  
510 Collectively, our bulk and single-cell analyses suggest a new hypothesis whereby  
511 genes associated with longevity in the human population may be most active in  
512 homeostatic microglial processes, or may control how readily innate immune cells  
513 exit the homeostatic state, while genes associated with AD are involved in responses  
514 to substantial disturbances of CNS homeostasis, such as age-related myelin  
515 breakdown and amyloid pathology (Fig. 8). The microglial-expressed genes may

516 govern whether microglia can resolve the myelin turnover and facilitate healthy  
517 ageing, or whether microglia fail to repair myelin damage, leading to CNS  
518 dyshomeostasis and potentially then to AD. This two-hit hypothesis involving control  
519 of microglial homeostatic functions, and then activation of microglia to support  
520 oligodendrocyte function may underlie how ageing and AD are linked. Discovering  
521 these genes showing variation associated with age may allow us to predict  
522 ‘physiological-age’ versus ‘chronological age’ in the brain, and thus to better predict  
523 AD and other age-related diseases. These insights may also lead to intelligent design  
524 of new biomarkers to track disease progression and new mechanistic insights for drug  
525 development.

526

#### 527 **Differences between human and mice age-related microglial responses**

528 Many studies have reported differences in microglial responses to AD-associated  
529 features between mice and humans, with characterisation of human AD microglia  
530 (HAM), and other related work<sup>41,60</sup>. Similarly, our preservation analysis showed only  
531 modest preservation of age-dependent microglial networks between human and mice.  
532 ARM/DAM are thought to be protective in mouse models of AD, thus the lack of the  
533 ARM/DAM profile at the end stages of disease could be a distinguishing factor for  
534 human AD. In our analysis we see a number of key genes are present in both the  
535 human and mouse age-dependent microglial network including *AIF1*, *C3*, *CD33*,  
536 *CLEC7A*, *CTSS*, *CX3CR1*, *IRF8*, *LAPTM5*, *P2RY13*, *TLR3* and *TREM2*. Genes  
537 unique to the mouse age-dependent microglial network included *B2m*, *Cst7*, *Pik3cg*  
538 and *Ccl4*, and also *Il33* which is expressed mostly by oligodendrocytes. IL-33 has  
539 been shown to have beneficial effects on synaptic plasticity, microglial clearance and  
540 AD-associated pathology in rodent models<sup>61-63</sup>. In contrast, genes unique to the

541 human age-dependent microglial network included some familiar genes known to be  
542 involved or implicated in AD, including *ABI3*, *CIQA-C*, *CSF1R*, *ITGAM*, *MRC1*,  
543 *MS4A6A*, *RUNX1*, *SAMSNI*, *SPI1* and *TYROBP*. An intriguing possibility is the  
544 stronger age-dependency of some of these genes in humans contribute to progression  
545 of AD. Our analysis of biological annotations associated with the age-dependent  
546 genes unique to either mouse or human, revealed that age-dependent genes unique to  
547 mouse were associated with antigen presentation involving MHC. In contrast, age-  
548 dependent genes unique to humans were associated with leukocyte activation,  
549 cytokine production and T cell activation. Recent studies have indicated that T cells  
550 expand in the brain during AD and ageing, and may contribute to disease  
551 progression<sup>64-68</sup>. Thus, microglial genes especially age-regulated in humans may  
552 contribute to ageing and AD, in part by recruitment and/or activation of other immune  
553 cells, including T cells.

554

555 **Human common gene-level variation associated with longevity is enriched in an**  
556 **age-dependent single-cell homeostatic microglial co-expression network**

557 While there are clearly differences between human and mouse microglial responses to  
558 ageing, the separation of genes into microglial functions afforded by our co-  
559 expression analysis of single-cell mouse microglial transcriptomes, combined with  
560 our analysis of longevity associated genes, highlighted that homeostatic functions of  
561 innate immune cells may be a significant contributor to longevity. Potentially, the loss  
562 of these functions during ageing, possibly triggered in the hippocampus by microglial  
563 activation to respond to age-related demyelination, may disrupt brain homeostasis,  
564 ultimately leading to less healthy ageing and an earlier death. This is a novel  
565 suggestion, but is not totally surprising, as markers of neuronal damage are positively

566 associated with mortality in elderly individuals<sup>69</sup>, and microglia's homeostatic  
567 functions maintain neuronal function and neurogenesis<sup>70-72</sup>. Additionally, by  
568 conducting this analysis and grouping co-expressed genes into modules enriched for  
569 associations to specific biological annotations and populations of microglia, we  
570 provide a resource for researchers to gain a preliminary idea of a potential function of  
571 their gene-of-interest, simply by looking up in which module it is expressed. As this  
572 approach was no doubt hampered by the sparse nature of scRNA-seq data, we foresee  
573 it to become even more capable to distinguish groups of co-expressed genes involved  
574 in similar cellular processes as technology improves.

575

576 We particularly highlight a potential role for microglia in mediating at least some of  
577 *ATXN2* and *FOXO3*'s impact on longevity, which requires further exploration.  
578 *FOXO3* has previously been reported to augment microglial proliferation, activation,  
579 and apoptotic injury<sup>73</sup>. Therefore, lower *FOXO3* levels could lead to longevity, as  
580 indicated by our TWAS of whole-blood samples, by reducing loss of homeostatic  
581 myeloid cells during ageing. To our knowledge, *ATXN2* function has not been  
582 investigated in microglia, although it is expressed in both mouse (as shown by this  
583 study) and human microglia (Myeloid Landscape dataset)<sup>41</sup>. Reduction of *Atxn2*  
584 expression extended the lifespan and decreased the pathology of a mouse model of  
585 neurodegeneration<sup>74</sup>.

586

587 *CASP8* is a protease with a well-known critical role in cell death mechanisms such as  
588 inflammation, necroptosis and apoptosis<sup>75-77</sup>. *CASP8* expression has been associated  
589 with several neurodegenerative disorders, in particular AD, Parkinson's disease, and  
590 autoimmune disorders<sup>75,76,78,79</sup>. Several studies demonstrated that LPS primed

591 microglia promoted microglial proliferation, survival and pro-inflammation in a  
592 CASP8-dependent manner, associated with neurotoxicity towards neurons<sup>75,76,80</sup>.  
593 *CASP8* has been reported to mediate A $\beta$ -induced neuronal apoptosis, leading to the  
594 characteristic neuronal loss in AD<sup>78</sup>. In a recent study, CASP8 was found to be active  
595 in multiple sclerosis (MS) lesions<sup>79</sup>. Surprisingly, while microglial *Casp8* ablation in  
596 experimental autoimmune encephalomyelitis mice didn't affect the course of disease,  
597 myeloid *Casp8* ablation worsened the autoimmune demyelination, as CASP8 acts as a  
598 negative regulator of the RIPK1/RIPK3/IL-1 $\beta$  pathway. Furthermore, a study of skin  
599 fibroblasts showed CASP8 cleaved ATG3 and p63, controlling autophagy and  
600 nutrient sensing, which are pathways known to be dysregulated in ageing<sup>81</sup>. This  
601 CASP8/AG3/p63 pathway has not been explored in other cell types, which would be  
602 beneficial for understanding the role of CASP8 in ageing. Finally, a decline in T cell  
603 numbers and impaired antibody production in B cells were observed in mice in the  
604 absence of *Casp8*<sup>82</sup>, emphasising its importance in immunity. These findings suggest  
605 a cell/tissue-specific role of *CASP8* in the body. Our TWAS data indicate lower levels  
606 of *CASP8* in the cortex and cerebellum are associated with longevity which may act  
607 by attenuating chronic neuroinflammation and cell death in the brain and thus,  
608 promote longevity. While we also saw in our TWAS data with whole blood the  
609 opposite effect to that in the cortex, where higher *CASP8* levels were associated with  
610 longevity, suggesting that *CASP8* may be beneficial for maintaining the innate and  
611 adaptive immune function of peripheral blood cells. It may be that the opposing  
612 effects seen for *CASP8* in cortex versus whole blood could be a direct effect of  
613 *CASP8* in longevity promotion in one cell type, followed by a secondary, indirect  
614 compensatory response in the other cell type.

615

## 616 **Oligodendrocyte function in ageing and AD**

617 Interestingly, changes in the expression of microglial co-expression modules showed  
618 remarkable similarity between ageing and responses to demyelination in young mice.  
619 Combined with the predominant oligodendrocytic expression of the bulk mouse  
620 microglial module's hub genes, this indicates that microglial responses during ageing  
621 could be driven by age-related demyelination. Therefore, it may be the microglial  
622 response to age-related demyelination that disrupts their longevity-associated  
623 homeostatic networks. Similarly, HAMS seen in human AD patients, have similar  
624 transcriptional profiles to microglial populations detected in MS patients, suggesting  
625 the possibility that demyelination may be a common phenomenon in ageing, MS, and  
626 AD<sup>41</sup>.

627

628 Early changes in myelination and oligodendrocytes have been identified with  
629 AD<sup>58,59,83-85</sup>. Indeed, recent work shows that *APOE* status affects myelination and  
630 oligodendrocyte function<sup>86,87</sup>. Myelin debris is lipid-rich and compacted, and so is  
631 difficult to digest by microglia. This may contribute to microglial dysfunction, brain  
632 ageing and neurodegeneration. In leukodystrophies (myelin degeneration), activated  
633 microglia collect in “nodules,” providing further evidence of the importance of  
634 microglia in responding to changes in myelin and axon integrity. White matter-  
635 associated microglia have distinct transcriptional profiles, depend on TREM2  
636 signalling and upregulate ARM-associated genes involved in lipid metabolism and  
637 phagocytosis (such as *ApoE*, *Cst7*, *Bm2* and *Ctsb*)<sup>13</sup>. This is consistent with the  
638 TREM2 receptor binding to a series of ligands related to myelin debris uptake  
639 including apolipoproteins and anionic lipids. In our age-dependent human  
640 transcriptome networks *TREM2* was central in the microglial network, alongside

641 downstream mediators *TYROBP* and *SYK* and this age-dependent network was  
642 enriched with genetic variation associated with AD. Individuals with homozygous  
643 loss-of-function of *TREM2* display Nasu-Hakola disease, where leukoencephalopathy  
644 is a prominent feature. Amongst our putative risk genes from the ageing-associated  
645 TWAS analysis include *EIF2B2*, *NPC1* and *TUFM* which show leukodystrophy as a  
646 feature in people inheriting mutations of these genes (Leukoencephalopathy with  
647 vanishing white matter, Niemann-Pick disease and combined oxidative  
648 phosphorylation deficiency 4, respectively). Thus, promoting myelin integrity and  
649 microglial activity to support remyelination is an emerging area of therapeutics for  
650 AD<sup>17,84,88</sup>.

651

#### 652 **Validation by subsequent GWAS studies**

653 A recent GWAS representing the largest association study for dementia identified  
654 *ANKH*, *GRN*, *PLEKHAI*, *SNXI* and *UNC5CL* as new genes of interest<sup>89</sup>, which  
655 validates our analysis here, as we also identify these genes as putative risk genes for  
656 AD, with a much smaller sample size than in the AD GWAS. We identified that the  
657 inorganic pyrophosphate transport regulator, *ANKH*, and *PLEKHAI* were expressed  
658 by DAM/ARM cells. *ANKH* is a transmembrane protein involved in pyrophosphate  
659 (PPi) and ATP efflux which inhibits excessive mineralization and calcification<sup>90</sup>, and  
660 is linked to altered mineralization of tissues, including calcification of the vasculature  
661 leading to atherosclerosis. Limited studies have investigated the role of *ANKH* *in vivo*,  
662 but one study addressing vascular calcification in a rat model reported that *ANKH*  
663 activity is suppressed by TNF-alpha-activated NF-κB in immune cells which  
664 promotes a pro-inflammatory signature, suggesting a role for this gene in regulating  
665 inflammation associated with disease<sup>91</sup>. Furthermore, study of a consanguineous



666 family with a novel *ANKH* mutation showed mental retardation in combination with  
667 the expected ankylosis and soft tissues, and provided the first evidence of the  
668 pathological effect of *ANKH* in the CNS<sup>92</sup>. Recent work has also shown strong  
669 association of *ANKH* genetic variation with cognitive change in people with normal  
670 ageing and probable AD using fluorodeoxyglucose-PET<sup>93</sup>. *GRN* was confirmed to be  
671 a risk gene for dementia<sup>89</sup>, and more specifically frontotemporal degeneration<sup>94</sup>. *GRN*  
672 was expressed by microglia transitioning to the DAM/ARM state in our analysis.  
673 *GRN* is of interest to the microglial community because loss-of-function mutations  
674 have been shown to cause excessive activation of microglia, showing generally  
675 opposing effects to *TREM2* loss-of-function mutations<sup>95</sup>. *SNX1* is expressed at the  
676 highest level by oligodendrocytes. *SNX1* is a member of the sorting nexin family  
677 (*SNX*) which is involved in endosomal protein sorting and its dysfunction has been  
678 linked to neurodegenerative diseases including AD<sup>96</sup>. *UNC5CL* was also part of the  
679 age-dependent oligodendrocyte network but is close to the *TREM2* locus and so may  
680 be linked to *TREM2* SNPs<sup>89</sup>.

681

### 682 **Canonical genes involved in neurodegeneration are associated with longevity**

683 Throughout these investigations we saw that many genes associated with different  
684 neurodegenerative conditions either showed genetic variation associated with  
685 lifespan, or were part of age-dependent co-expression modules, suggesting that these  
686 neurodegenerative genes may exert part of their effects in regulating disease in  
687 response to specific cellular processes during ageing. We saw that *MAPT* had genetic  
688 association with longevity at the gene-level assessed by GWAS SNPs (gene-based  $p =$   
689 0.04), and was significant in our TWAS analysis showing that lower expression of  
690 *MAPT* in the cerebellum was associated with longevity (Supplementary Fig. 5).

691 *PSENI* is a hub gene in the human age-dependent oligodendrocyte network (Fig. 5).  
692 *Mobp*, whose human orthologue is a risk gene for tauopathy progressive supranuclear  
693 palsy, corticobasal degeneration and amyotrophic lateral sclerosis<sup>97-99</sup>, was a hub gene  
694 in the mouse age-dependent oligodendrocyte network (Fig. 1). *HTT*, which shows  
695 repeat expansions causing Huntington's disease, showed genome-wide significance in  
696 our TWAS analysis, with lower expression of *HTT* in the whole blood associated with  
697 longevity (Supplementary Fig. 5). Similarly, expansion of CAG trinucleotide repeats  
698 in the *ATXN2* gene are associated with increased risk of amyotrophic lateral  
699 sclerosis<sup>100</sup>, and *ATXN2* was a significant TWAS hit in our study. These findings  
700 suggest that common genetic variation in these genes, or their co-expression  
701 networks, may also modify lifespan through changes in gene expression between  
702 human individuals, in contrast to the familial mutations seen in genes such as *MAPT*  
703 and *PSENI* which alter the amino acid sequence and lead to the protein deposition  
704 that is seen in early onset neurodegeneration.

705

### 706 **General immune system changes may govern whole organism ageing**

707 The putative gene variants associated with longevity in this study, although identified  
708 by enrichment in the homeostatic microglial network of the brain, are expressed in  
709 other immune cells including CD4<sup>+</sup> T memory T<sub>REG</sub> cells, natural killer cells,  
710 neutrophils, monocytes and macrophages<sup>101-103</sup>. A possibility remains that these  
711 identified genes may affect the ageing of the brain and progression of AD by  
712 interaction of CNS-resident microglia with other immune cells associated with the  
713 blood-brain barrier or throughout the body. T cell changes in the brain that may  
714 contribute to ageing and AD have been discussed above<sup>64-67</sup>. Putative ageing-  
715 associated genes include *CASP8*, *FES*, *ZKSCAN5*, *JAM3*, *STAT3* and *USP38*, which

716 are expressed by multiple immune cells. It is also possible that the function of these  
717 genes in immune cells impact the ageing of the brain via intermediate tissues, such as  
718 the vasculature, which has recently been shown to contribute to brain ageing<sup>104,105</sup>.  
719 The immediate next steps of this work are to investigate the array of homeostatic  
720 functions of these ageing-associated genes in microglia. Collectively the immune  
721 system changes described in our study are likely to contribute to the “Inflammageing”  
722 hypothesis of ageing, whereby chronic inflammatory processes promote the ageing of  
723 multiple tissues<sup>68,106</sup>, including the brain.

724

725 In conclusion, we identify unbiased co-expression networks in the ageing brain that  
726 are enriched for genetic variation associated with AD or longevity to gain new  
727 insights into the cell types and cellular processes driving brain ageing and AD. We  
728 show that genetic risk for AD is enriched in age-dependent activated microglia and  
729 oligodendrocytes. In contrast, we show that genetic variation associated with  
730 longevity is enriched in homeostatic microglia. Thus genetic variants associated with  
731 longevity and AD both fall on microglia but controlling different and opposing states  
732 of their function (homeostatic versus activated). Understanding the function of these  
733 priority risk and hub genes may allow us to develop interventions to slow age-related  
734 brain decline and AD. These genetic networks driving ageing, AD and inflammageing  
735 may help to predict the physiological age of the brain and AD progression more  
736 accurately in individual people by generation of biomarker and genotyping assays.

737

## 738 **Methods**

### 739 **Sample cohorts**

740 *AD*: we used the publicly available GWAS summary statistics data from the  
741 International Genomics of Alzheimer's Projects (IGAP) from the stage 1 GWAS  
742 meta-analysis of 21,982 AD cases and 41,944 cognitively normal controls<sup>21</sup>.

743

744 *Ageing*: we used the publicly available summary statistics data from European-  
745 ancestry GWAS data with overlapping ageing traits, incorporating three GWASs  
746 covering healthspan (300,477 individuals, of which 28.3% were not healthy), parental  
747 lifespan (1,012,240 parents, of which 60% were deceased), and longevity (defined  
748 by 11,262 individuals surviving to the 90th percentile of life, and 25,483 controls  
749 whose age at death corresponds to the 60th survival percentile)<sup>10,11</sup>.

750

### 751 **Gene-based analysis**

752 Gene-based testing was performed using MAGMA v1.08<sup>107</sup> to obtain gene-based  
753 significance (p-values) using GWAS summary statistics. The gene-based approach we  
754 used summarizes the strength of the association of multiple adjacent SNPs restricted  
755 to individual gene boundaries (sequence between the first and last exons, including  
756 the introns), and so accounts for common and complex DNA variants associated with  
757 a particular trait, e.g. if longevity is conferred by several (semi) independent SNPs  
758 within a locus, each with moderate effect sizes<sup>107,108</sup>. SNPs were assigned to genes  
759 based on the location obtained from the NCBI (no annotation window was added  
760 around the genes), and Phase 3 of 1,000 Genome build 37 was used as a reference  
761 panel. All required files can be downloaded from the software's website  
762 (<https://ctg.cncr.nl/software/magma>). Finally, the SNP-wise mean model was used for

763 the analysis. We report the gene-based p-values both before and after the FDR  
764 correction.

765

### 766 **RNA-seq data pre-processing**

767 Transcripts per million (TPM) normalised bulk RNA-seq datasets generated from  
768 wild-type C57BL/6J mice (8-, 16-, 32-, and 72-weeks-of-age; data available from  
769 Mouseac.org)<sup>24</sup>, and non-diseased human hippocampi (from 196 individuals; v8 TPM  
770 counts downloaded from [gtexportal.org/home/datasets](http://gtexportal.org/home/datasets))<sup>43</sup>, were filtered to remove  
771 genes with <5% variation between samples, or mean expression levels below 0.5  
772 TPM in all experimental groups. As large differences in gene expression distributions  
773 between samples were detected in GTEx data, this data was quantile-quantile  
774 normalised using preprocessCore R package's *normalize.quantiles* function. These  
775 bulk RNA-seq datasets were then transformed by  $\log_2(\text{normalised counts}+1)$ . Batch  
776 effects were analysed in bulk RNA-seq datasets by multidimensional scaling using the  
777 limma R package's *plotMDS* function to visualise sample clustering due to  
778 sequencing batch. Additionally, correlation of batch covariates to principle  
779 components of variation between samples, were identified using the swamp R  
780 package's *prince* function and the CoExpNets R package's *princePlot* function<sup>23</sup>.

781

782 Bulk RNA-seq datasets generated from microglia isolated from the hippocampus of  
783 aged and adult wild-type mice<sup>35</sup> (data available from publication), or the corpus  
784 callosum of mice treated for zero, 5-, or 12-weeks with a demyelinating cuprizone  
785 diet<sup>40</sup> (data downloaded from GSO: GSE130627), were normalised using DeSeq2's  
786 *estimatesizefactors* function<sup>109</sup>. Genes with an average detection level <1.5  
787 normalised counts were removed.

788

789 Normalised bulk RNA-seq datasets generated from the hippocampi of wild-type mice  
790 of different ages<sup>31-33</sup>, used to assess module preservation, were downloaded from  
791 [Synapse accession syn20808171](#), GSO: GSE110741, and GSO: GSE61918,  
792 respectively. Genes with an average detection level <0.5 normalised counts or  
793 between sample variation <5%, and samples detected as outliers by having p<0.05  
794 result from the outliers R package's *grubbs.test* function were removed.

795

796 Raw counts generated by plate-based scRNA-seq of microglia isolated from the  
797 hippocampi of 3-, 6-, 12-, and 21-month-old wild-type mice (downloaded from  
798 GSE127893; non-hippocampal and *APP<sup>NL-G-F</sup>* samples were removed)<sup>34</sup>, were filtered  
799 to remove cells which appeared either unhealthy (>5% of reads aligned to  
800 mitochondrial genes or <1500 transcripts or <1000 genes sequenced) or potential  
801 doublets (>3500 genes sequenced). Counts were then transformed by log<sub>2</sub>(normalised  
802 counts+1), and genes not detected in >98.5% of cells in all predefined clusters, or  
803 with between sample variation <4%, were removed. Batch effects were assessed by  
804 running downstream analysis and determining correlation of generated modules to  
805 sequencing plate.

806

807 As all datasets demonstrated batch effects, these were removed using limma's  
808 *removeBatchEffect* function. The effects of trait(s)-of-interest were preserved using  
809 this function's design argument. This function's covariate argument was also used to  
810 remove the effects of confounding covariates, extraction batch, sequencing batch,  
811 post-mortem interval, sex, cause of death, and centre of origin, from the GTEx  
812 dataset.

## 813 Co-expression network analysis

### 814 Module Construction

815 Co-expression analysis was performed on pre-processed datasets using CoExpNets'  
816 *getDownstreamNetwork* function. CoExpNets is an optimisation of the popular  
817 WGCNA package<sup>22</sup>, which uses an additional k-means clustering step to reassign  
818 genes to more appropriate modules, producing more biologically relevant and  
819 reproducible modules<sup>23</sup>. Module eigengenes (ME), identified by CoExpNets were  
820 correlated (Pearson's product moment correlation) to numeric traits of interest using  
821 CoExpNets' *corWithNumTraits* function, or to categorical traits using the  
822 *corWithCatTraits* function.

823

### 824 Biological annotation

825 Modules formed by co-expression analysis were assessed for enrichment of cell-type  
826 specific genes using CoExpNets' *genAnnotationCellType* function. Module  
827 enrichment for biological annotations was assessed using the Gprofiler2 R package's  
828 *gost* function<sup>44</sup>. The genes assigned to the module (ordered by correlation with the  
829 module eigengene), were input as the query argument and all genes expressed above  
830 the expression threshold (TPM = 0.5 for bulk RNA-seq datasets, and detection in  
831 >2.5% of cells in any cell cluster for scRNA-seq datasets), were used as the custom  
832 background. Predicted annotations were excluded, and p-values were Bonferroni  
833 corrected. Module expression by age was assessed by two-tailed Student's *t*-test of the  
834 mean expression of the module's 100 most central genes (genes with highest  
835 correlation with the module eigengene) in the processed O'Neil *et al.* (2018) dataset<sup>35</sup>,  
836 while module expression in cuprizone treatment groups was assessed by one-way  
837 ANOVA followed by the pairwise comparison of cuprizone diet timepoints to control

838 diet using Dunnett's test if the ANOVA indicated a significant difference between  
839 treatment groups ( $p < 0.05$ ), in the processed Nugent *et al.* (2020) dataset<sup>40</sup>.

840

841 **Module preservation**

842 Module preservation between our networks was calculated in pre-processed datasets  
843 described above, using CoExpNets' *preservationoneway* function. Control module  
844 size was set to 400. This returned preservation statistics calculated by the WGCNA  
845 *modulePreservation* function<sup>110</sup>, of which *z.summary* (summary of other preservation  
846 statistics), was reported unless the two sub-measures of preservation (*z.connectivity*  
847 and *z.density*) differed significantly. Comparison between human and mouse datasets  
848 was preceded by conversion of gene symbols to orthologues using the biomaRt R  
849 package<sup>111</sup>. Module eigengenes were detected in query datasets using CoExpNets  
850 *getNetworkEigengenes* function.

851

852 **Pseudotime analysis**

853 We used the Monocle 2 R package to infer single-cell transcriptional trajectories<sup>38,112</sup>,  
854 based on the expression of genes significantly differentially expressed ( $qval < 0.025$ )  
855 between cell clusters identified in Ref<sup>34</sup>.

856

857 **Enrichment analyses of identified overlapping genes**

858 Enrichment analyses were performed by comparing the number of overlapping genes  
859 showing genetic association with AD or longevity derived from summary statistics  
860 from Kunkle *et al.* (2019)<sup>21</sup>, and Timmers *et al.* (2020)<sup>10</sup>, respectively, to our  
861 transcriptome module gene-sets with gene-sets randomly bootstrapped  
862 (Niterations=100,000), from genes reliably expressed in the bulk RNA-seq ( $>0.5$



863 TPM in any experimental group), and scRNA-seq datasets (expressed in >2.5% cells  
864 from any cluster). The random gene sets were matched to the gene sets of interest by:  
865 a) the number of genes in a set, and b) the numbers of independent SNPs per gene.  
866 The latter was estimated by MAGMA software as the number of principal  
867 components of the SNP data matrix of the gene, pruning away principal components  
868 with very small eigenvalues ensuring that only 0.1% of the variance in the SNP data  
869 matrix is pruned away. The enrichment analyses p-values (bootstrap p-values in the  
870 text) do not require correction for multiple testing because the different age-associated  
871 gene modules were pre-selected from different transcriptome datasets (*i.e.* mouse  
872 versus human, bulk versus single-cell RNA-seq).

873

#### 874 **Transcriptome-wise association study (TWAS)**

875 Expression weights were used in TWAS for autosomal chromosomes and excluding  
876 the MHC region, with the longevity summary statistics<sup>10</sup>, using the R script  
877 FUSION.assoc\_test.R from the FUSION software<sup>113</sup>. The TWAS weights were  
878 downloaded from the FUSION website (GTEx7 Brain (13 tissues), GTEx7 Whole  
879 blood)<sup>43,49</sup>, YFS blood<sup>50</sup>, NTR blood<sup>51</sup>, and for all monocytes in the dataset produced  
880 by Fairfax *et al.* (2014)<sup>48</sup> (samples: CD14, LPS2, LPS24 and IFN-gamma),  
881 downloaded from [https://github.com/janetcharwood/MONOCYTE\\_TWAS](https://github.com/janetcharwood/MONOCYTE_TWAS) (see  
882 Harwood *et al.* (2021)<sup>20</sup> for details). Bonferroni correction for the number of genes  
883 analysed in each tissue was used to determine significance of TWAS associations.  
884 Plink v1.9 was used for SNP quality-control analysis, and MAGMA (v1.08) to obtain  
885 gene-wide p-values, and Logistic regression was performed in R.

886

887 **Acknowledgements**

888 This work was funded by the UK DRI, which receives its funding from the DRI Ltd,  
889 funded by the UK Medical Research Council, Alzheimer’s Society and Alzheimer’s  
890 Research UK (ARUK). DAS also received funding from the ARUK pump priming  
891 scheme via the UCL network. JH is supported by the Dolby Foundation, and by the  
892 National Institute for Health Research University College London Hospitals  
893 Biomedical Research Centre. The Genotype-Tissue Expression (GTEx) Project was  
894 supported by the Common Fund of the Office of the Director of the National Institutes  
895 of Health, and by NCI, NHGRI, NHLBI, NIDA, NIMH, and NINDS. The data used  
896 for the analyses described in this manuscript were obtained from the GTEx Portal.

897

898 **Code and data availability**

899 The R code for performing the data analysis described in this manuscript will be made  
900 freely available via GitHub. The data used for this study are publicly available for  
901 non-commercial research purposes, accession numbers are given in Methods.

902

## 903 References

- 904 1. Wahl, D. *et al.* Nutritional strategies to optimise cognitive function in the aging  
905 brain. *Ageing Res. Rev.* **31**, 80–92 (2016).
- 906 2. Murman, D. L. The Impact of Age on Cognition. *Semin. Hear.* **36**, 111–121  
907 (2015).
- 908 3. Fan, X., Wheatley, E. G. & Villeda, S. A. Mechanisms of Hippocampal Aging  
909 and the Potential for Rejuvenation. *Annu. Rev. Neurosci.* **40**, 251–272 (2017).
- 910 4. Volianskis, A. *et al.* Long-term potentiation and the role of N-methyl-D-  
911 aspartate receptors. *Brain Res.* **1621**, 5–16 (2015).
- 912 5. Partridge, L., Fuentealba, M. & Kennedy, B. K. The quest to slow ageing  
913 through drug discovery. *Nature Reviews Drug Discovery* **19**, 513–532 (2020).
- 914 6. Middeldorp, J. *et al.* Preclinical assessment of young blood plasma for  
915 Alzheimer disease. *JAMA Neurol.* **73**, 1325–1333 (2016).
- 916 7. Salih, D. A. & Brunet, A. FoxO transcription factors in the maintenance of  
917 cellular homeostasis during aging. *Current Opinion in Cell Biology* **20**, 126–  
918 136 (2008).
- 919 8. Askew, K. *et al.* Coupled Proliferation and Apoptosis Maintain the Rapid  
920 Turnover of Microglia in the Adult Brain. *Cell Rep.* **18**, 391–405 (2017).
- 921 9. Udeochu, J. C., Shea, J. M. & Villeda, S. A. Microglia communication:  
922 Parallels between aging and Alzheimer’s disease. *Clin. Exp. Neuroimmunol.* **7**,  
923 114–125 (2016).
- 924 10. Timmers, P. R. H. J., Wilson, J. F., Joshi, P. K. & Deelen, J. Multivariate  
925 genomic scan implicates novel loci and haem metabolism in human ageing.  
926 *Nat. Commun.* **11**, 1–10 (2020).
- 927 11. Deelen, J. *et al.* A meta-analysis of genome-wide association studies identifies

- 928 multiple longevity genes. *Nat. Commun.* **10**, 1–14 (2019).
- 929 12. Safaiyan, S. *et al.* Age-related myelin degradation burdens the clearance  
930 function of microglia during aging. *Nat. Neurosci.* **19**, 995–998 (2016).
- 931 13. Safaiyan, S. *et al.* White matter aging drives microglial diversity. *Neuron* **109**,  
932 1100-1117.e10 (2021).
- 933 14. Mahmood, A. & Miron, V. E. Microglia as therapeutic targets for central  
934 nervous system remyelination. *Curr. Opin. Pharmacol.* **63**, 102188 (2022).
- 935 15. White, C. W. 3rd, Pratt, K. & Villeda, S. A. OPCs on a Diet: A Youthful  
936 Serving of Remyelination. *Cell Metab.* **30**, 1004–1006 (2019).
- 937 16. Lloyd, A. F. *et al.* Central nervous system regeneration is driven by microglia  
938 necroptosis and repopulation. *Nat. Neurosci.* **22**, 1046–1052 (2019).
- 939 17. McNamara, N. B. *et al.* Microglia regulate central nervous system myelin  
940 growth and integrity. *Nature* **613**, 120–129 (2023).
- 941 18. Depp, C. *et al.* Ageing-associated myelin dysfunction drives amyloid  
942 deposition in mouse models of Alzheimer’s disease. *bioRxiv*  
943 2021.07.31.454562 (2021). doi:10.1101/2021.07.31.454562.
- 944 19. Yassa, M. A. *et al.* Pattern separation deficits associated with increased  
945 hippocampal CA3 and dentate gyrus activity in nondemented older adults.  
946 *Hippocampus* **21**, 968–979 (2011).
- 947 20. Harwood, J. C. *et al.* Defining functional variants associated with Alzheimer’s  
948 disease in the induced immune response. *Brain Commun.* **3**, fcab083 (2021).
- 949 21. Kunkle, B. W. *et al.* Genetic meta-analysis of diagnosed Alzheimer’s disease  
950 identifies new risk loci and implicates A $\beta$ , tau, immunity and lipid processing.  
951 *Nat. Genet.* **51**, 414–430 (2019).
- 952 22. Langfelder, P. & Horvath, S. WGCNA: an R package for weighted correlation

- 953 network analysis. *BMC Bioinformatics* **9**, 559 (2008).
- 954 23. Botía, J. A. *et al.* An additional k-means clustering step improves the biological  
955 features of WGCNA gene co-expression networks. *BMC Syst. Biol.* **11**, 47  
956 (2017).
- 957 24. Salih, D. A. *et al.* Genetic variability in response to amyloid beta deposition  
958 influences Alzheimer’s disease risk. *Brain Commun.* **1**, fcz022 (2019).
- 959 25. Xue, Z. *et al.* Genetic programs in human and mouse early embryos revealed  
960 by single-cell RNA sequencing. *Nature* **500**, 593–597 (2013).
- 961 26. van Dam, S., Võsa, U., van der Graaf, A., Franke, L. & de Magalhães, J. P.  
962 Gene co-expression analysis for functional classification and gene–disease  
963 predictions. *Brief. Bioinform.* **19**, 575–592 (2018).
- 964 27. Ogradnik, M. *et al.* Whole-body senescent cell clearance alleviates age-related  
965 brain inflammation and cognitive impairment in mice. *Aging Cell* **20**, e13296  
966 (2021).
- 967 28. Butler, C. A. *et al.* Microglial phagocytosis of neurons in neurodegeneration,  
968 and its regulation. *J. Neurochem.* **158**, 621–639 (2021).
- 969 29. He, D. *et al.* Disruption of the IL-33-ST2-AKT signaling axis impairs  
970 neurodevelopment by inhibiting microglial metabolic adaptation and  
971 phagocytic function. *Immunity* **55**, 159-173.e9 (2022).
- 972 30. Nguyen, P. T. *et al.* Microglial Remodeling of the Extracellular Matrix  
973 Promotes Synapse Plasticity. *Cell* **182**, 388-403.e15 (2020).
- 974 31. Zhao, N. *et al.* Alzheimer’s Risk Factors Age , APOE Genotype , and Sex  
975 Drive Distinct Molecular Pathways. *Neuron* **106**, 727-742.e6 (2020).
- 976 32. Sierksma, A. *et al.* Novel Alzheimer risk genes determine the microglia  
977 response to amyloid- $\beta$  but not to TAU pathology. *EMBO Mol. Med.* **12**, e10606

- 978 (2020).
- 979 33. Stilling, R. M. *et al.* De-regulation of gene expression and alternative splicing  
980 affects distinct cellular pathways in the aging hippocampus. *Front. Cell.*  
981 *Neurosci.* **8**, 373 (2014).
- 982 34. Sala Frigerio, C. *et al.* The Major Risk Factors for Alzheimer’s Disease: Age,  
983 Sex, and Genes Modulate the Microglia Response to A $\beta$  Plaques. *Cell Rep.* **27**,  
984 1293-1306.e6 (2019).
- 985 35. O’Neil, S. M., Witcher, K. G., McKim, D. B. & Godbout, J. P. Forced turnover  
986 of aged microglia induces an intermediate phenotype but does not rebalance  
987 CNS environmental cues driving priming to immune challenge. *Acta*  
988 *Neuropathol. Commun.* **6**, 129 (2018).
- 989 36. Keren-Shaul, H. *et al.* A Unique Microglia Type Associated with Restricting  
990 Development of Alzheimer’s Disease. *Cell* **169**, 1276-1290.e17 (2017).
- 991 37. Qiu, X. *et al.* Reversed graph embedding resolves complex single-cell  
992 trajectories. *Nat. Methods* **14**, 979–982 (2017).
- 993 38. Trapnell, C. *et al.* The dynamics and regulators of cell fate decisions are  
994 revealed by pseudotemporal ordering of single cells. *Nat. Biotechnol.* **32**, 381–  
995 386 (2014).
- 996 39. Hill, R. A., Li, A. M. & Grutzendler, J. Lifelong cortical myelin plasticity and  
997 age-related degeneration in the live mammalian brain. *Nat. Neurosci.* **21**, 683–  
998 695 (2018).
- 999 40. Nugent, A. A. *et al.* TREM2 Regulates Microglial Cholesterol Metabolism  
1000 upon Chronic Phagocytic Challenge. *Neuron* **105**, 837-854.e9 (2020).
- 1001 41. Srinivasan, K. *et al.* Alzheimer’s Patient Microglia Exhibit Enhanced Aging  
1002 and Unique Transcriptional Activation. *Cell Rep.* **31**, 107843 (2020).

- 1003 42. Galatro, T. F. *et al.* Transcriptomic analysis of purified human cortical  
1004 microglia reveals age-associated changes. *Nat. Neurosci.* **20**, 1162–1171  
1005 (2017).
- 1006 43. Human genomics. The Genotype-Tissue Expression (GTEx) pilot analysis:  
1007 multitissue gene regulation in humans. *Science* **348**, 648–660 (2015).
- 1008 44. Kolberg, L., Raudvere, U., Kuzmin, I., Vilo, J. & Peterson, H. gprofiler2 -- an  
1009 R package for gene list functional enrichment analysis and namespace  
1010 conversion toolset g:Profiler [version 2; peer review: 2 approved].  
1011 *F1000Research* **9**(ELIXIR), 709 (2020).
- 1012 45. Sanese, P., Forte, G., Disciglio, V., Grossi, V. & Simone, C. FOXO3 on the  
1013 Road to Longevity: Lessons From SNPs and Chromatin Hubs. *Comput. Struct.*  
1014 *Biotechnol. J.* **17**, 737–745 (2019).
- 1015 46. Imbert, G. *et al.* Cloning of the gene for spinocerebellar ataxia 2 reveals a locus  
1016 with high sensitivity to expanded CAG/glutamine repeats. *Nat. Genet.* **14**, 285–  
1017 291 (1996).
- 1018 47. Fritsch, M. *et al.* Caspase-8 is the molecular switch for apoptosis, necroptosis  
1019 and pyroptosis. *Nature* **575**, 683–687 (2019).
- 1020 48. Fairfax, B. P. *et al.* Innate immune activity conditions the effect of regulatory  
1021 variants upon monocyte gene expression. *Science* **343**, 1246949 (2014).
- 1022 49. Aguet, F. *et al.* The GTEx Consortium atlas of genetic regulatory effects across  
1023 human tissues. *bioRxiv* 787903 (2019). doi:10.1101/787903.
- 1024 50. Raitakari, O. T. *et al.* Cohort profile: the cardiovascular risk in Young Finns  
1025 Study. *Int. J. Epidemiol.* **37**, 1220–1226 (2008).
- 1026 51. Willemsen, G. *et al.* The Netherlands Twin Register biobank: a resource for  
1027 genetic epidemiological studies. *Twin Res. Hum. Genet. Off. J. Int. Soc. Twin*

- 1028            *Stud.* **13**, 231–245 (2010).
- 1029    52.    Liu, C.-C., Liu, C.-C., Kanekiyo, T., Xu, H. & Bu, G. Apolipoprotein E and  
1030            Alzheimer disease: risk, mechanisms and therapy. *Nature reviews. Neurology*  
1031            **9**, 106–118 (2013).
- 1032    53.    Sierksma, A., Escott-Price, V. & De Strooper, B. Translating genetic risk of  
1033            Alzheimer’s disease into mechanistic insight and drug targets. *Science* **370**,  
1034            61–66 (2020).
- 1035    54.    Prins, N. D. & Scheltens, P. White matter hyperintensities, cognitive  
1036            impairment and dementia: An update. *Nature Reviews Neurology* **11**, 157–165  
1037            (2015).
- 1038    55.    Murphy, K. B., Nott, A. & Marzi, S. J. CHAS, a deconvolution tool, infers cell  
1039            type-specific signatures in bulk brain histone acetylation studies of brain  
1040            disorders. *bioRxiv* 2021.09.06.459142 (2021). doi:10.1101/2021.09.06.459142.
- 1041    56.    Saito, E. R. *et al.* Alzheimer’s disease alters oligodendrocytic glycolytic and  
1042            ketolytic gene expression. *Alzheimers. Dement.* **17**, 1474–1486 (2021).
- 1043    57.    Murthy, M. *et al.* Epigenetic age acceleration is associated with  
1044            oligodendrocyte proportions in MSA and control brain tissue. *Neuropathol.*  
1045            *Appl. Neurobiol.* **49**, e12872 (2023).
- 1046    58.    Vanzulli, I. *et al.* Disruption of oligodendrocyte progenitor cells is an early sign  
1047            of pathology in the triple transgenic mouse model of Alzheimer’s disease.  
1048            *Neurobiol. Aging* **94**, 130–139 (2020).
- 1049    59.    Chacon-De-La-Rocha, I. *et al.* Accelerated Dystrophy and Decay of  
1050            Oligodendrocyte Precursor Cells in the APP/PS1 Model of Alzheimer’s-Like  
1051            Pathology. *Front. Cell. Neurosci.* **14**, 575082 (2020).
- 1052    60.    Gosselin, D. *et al.* An environment-dependent transcriptional network specifies



- 1053 human microglia identity. *Science* **356**, (2017).
- 1054 61. Wang, Y. *et al.* Astrocyte-secreted IL-33 mediates homeostatic synaptic  
1055 plasticity in the adult hippocampus. *Proc. Natl. Acad. Sci. U. S. A.* **118**,  
1056 e2020810118 (2021).
- 1057 62. Lau, S.-F. *et al.* IL-33-PU.1 Transcriptome Reprogramming Drives Functional  
1058 State Transition and Clearance Activity of Microglia in Alzheimer’s Disease.  
1059 *Cell Rep.* **31**, 107530 (2020).
- 1060 63. Fu, A. K. Y. *et al.* IL-33 ameliorates Alzheimer’s disease-like pathology and  
1061 cognitive decline. *Proc. Natl. Acad. Sci. U. S. A.* **113**, E2705-13 (2016).
- 1062 64. Gate, D. *et al.* Clonally expanded CD8 T cells patrol the cerebrospinal fluid in  
1063 Alzheimer’s disease. *Nature* **577**, 399–404 (2020).
- 1064 65. Lemaitre, P. *et al.* Molecular and cognitive signatures of ageing partially  
1065 restored through synthetic delivery of IL2 to the brain. *bioRxiv*  
1066 2022.03.01.482519 (2022) doi:10.1101/2022.03.01.482519.
- 1067 66. Yshii, L. *et al.* The AppNL-G-F mouse model of Alzheimer’s disease is  
1068 refractory to regulatory T cell treatment. *bioRxiv* 2022.03.11.483903 (2022).  
1069 doi:10.1101/2022.03.11.483903.
- 1070 67. Kaya, T. *et al.* CD8<sup>+</sup> T cells induce interferon-responsive oligodendrocytes and  
1071 microglia in white matter aging. *Nat. Neurosci.* **25**, 1446–1457 (2022).
- 1072 68. Borgoni, S., Kudryashova, K. S., Burka, K. & de Magalhães, J. P. Targeting  
1073 immune dysfunction in aging. *Ageing Res. Rev.* **70**, 101410 (2021).
- 1074 69. RübSamen, N. *et al.* Serum neurofilament light and tau as prognostic markers  
1075 for all-cause mortality in the elderly general population—an analysis from the  
1076 MEMO study. *BMC Med.* **19**, 38 (2021).
- 1077 70. Rogers, J. T. *et al.* CX3CR1 deficiency leads to impairment of hippocampal

- 1078 cognitive function and synaptic plasticity. *J. Neurosci.* **31**, 16241–16250  
1079 (2011).
- 1080 71. Costello, D. A. *et al.* Long term potentiation is impaired in membrane  
1081 glycoprotein CD200-deficient mice: A role for toll-like receptor activation. *J.*  
1082 *Biol. Chem.* **286**, 34722–34732 (2011).
- 1083 72. Bachstetter, A. D. *et al.* Fractalkine and CX 3CR1 regulate hippocampal  
1084 neurogenesis in adult and aged rats. *Neurobiol. Aging* **32**, 2030–2044 (2011).
- 1085 73. Shang, Y., Chong, Z., Hou, J. & Maiese, K. The Forkhead Transcription Factor  
1086 FOXO3a Controls Microglial Inflammatory Activation and Eventual Apoptotic  
1087 Injury through Caspase 3. *Curr. Neurovasc. Res.* **6**, 20–31 (2009).
- 1088 74. Becker, L. A. *et al.* Therapeutic reduction of ataxin-2 extends lifespan and  
1089 reduces pathology in TDP-43 mice. *Nature* **544**, 367–371 (2017).
- 1090 75. Burguillos, M. A. *et al.* Caspase signalling controls microglia activation and  
1091 neurotoxicity. *Nature* **472**, 319–324 (2011).
- 1092 76. Zhang, C.-J. *et al.* TLR-stimulated IRAKM activates caspase-8 inflammasome  
1093 in microglia and promotes neuroinflammation. *J. Clin. Invest.* **128**, 5399–5412  
1094 (2018).
- 1095 77. Orning, P. & Lien, E. Multiple roles of caspase-8 in cell death, inflammation,  
1096 and innate immunity. *J. Leukoc. Biol.* **109**, 121–141 (2021).
- 1097 78. Wei, W., Norton, D. D., Wang, X. & Kusiak, J. W. Abeta 17-42 in Alzheimer’s  
1098 disease activates JNK and caspase-8 leading to neuronal apoptosis. *Brain* **125**,  
1099 2036–2043 (2002).
- 1100 79. Kim, S., Lu, H. C., Steelman, A. J. & Li, J. Myeloid caspase-8 restricts RIPK3-  
1101 dependent proinflammatory IL-1 $\beta$  production and CD4 T cell activation in  
1102 autoimmune demyelination. *Proc. Natl. Acad. Sci. U. S. A.* **119**, e2117636119

- 1103 (2022).
- 1104 80. Xu, S., Zhang, H., Yang, X., Qian, Y. & Xiao, Q. Inhibition of cathepsin L  
1105 alleviates the microglia-mediated neuroinflammatory responses through  
1106 caspase-8 and NF- $\kappa$ B pathways. *Neurobiol. Aging* **62**, 159–167 (2018).
- 1107 81. Sanchez-Garrido, J., Sancho-Shimizu, V. & Shenoy, A. R. Regulated  
1108 proteolysis of p62/SQSTM1 enables differential control of autophagy and  
1109 nutrient sensing. *Sci. Signal.* **11**, eaat6903 (2018).
- 1110 82. Lemmers, B. *et al.* Essential role for caspase-8 in Toll-like receptors and  
1111 NFkappaB signaling. *J. Biol. Chem.* **282**, 7416–7423 (2007).
- 1112 83. Bouhrara, M. *et al.* Evidence of demyelination in mild cognitive impairment  
1113 and dementia using a direct and specific magnetic resonance imaging measure  
1114 of myelin content. *Alzheimer's Dement.* **14**, 998–1004 (2018).
- 1115 84. Chen, J.-F. *et al.* Enhancing myelin renewal reverses cognitive dysfunction in a  
1116 murine model of Alzheimer's disease. *Neuron* **109**, 2292-2307.e5 (2021).
- 1117 85. Sadick, J. S. *et al.* Astrocytes and oligodendrocytes undergo subtype-specific  
1118 transcriptional changes in Alzheimer's disease. *Neuron* **110**, 1788-1805.e10  
1119 (2022).
- 1120 86. Cheng, G. W.-Y. *et al.* Apolipoprotein E  $\epsilon$ 4 Mediates Myelin Breakdown by  
1121 Targeting Oligodendrocytes in Sporadic Alzheimer Disease. *J. Neuropathol.*  
1122 *Exp. Neurol.* **81**, 717–730 (2022).
- 1123 87. Blanchard, J. W. *et al.* APOE4 impairs myelination via cholesterol  
1124 dysregulation in oligodendrocytes. *Nature* **611**, 769–779 (2022).
- 1125 88. Nasrabady, S. E., Rizvi, B., Goldman, J. E. & Brickman, A. M. White matter  
1126 changes in Alzheimer's disease: a focus on myelin and oligodendrocytes. *Acta*  
1127 *Neuropathol. Commun.* **6**, 22 (2018).

- 1128 89. Bellenguez, C. *et al.* New insights into the genetic etiology of Alzheimer’s  
1129 disease and related dementias. *Nat. Genet.* **54**, 412–436 (2022).
- 1130 90. Ho, A. M., Johnson, M. D. & Kingsley, D. M. Role of the mouse ank gene in  
1131 control of tissue calcification and arthritis. *Science* **289**, 265–270 (2000).
- 1132 91. Zhao, G. *et al.* Activation of nuclear factor-kappa B accelerates vascular  
1133 calcification by inhibiting ankylosis protein homolog expression. *Kidney Int.*  
1134 **82**, 34–44 (2012).
- 1135 92. Morava, E. *et al.* Autosomal recessive mental retardation, deafness, ankylosis,  
1136 and mild hypophosphatemia associated with a novel ANKH mutation in a  
1137 consanguineous family. *J. Clin. Endocrinol. Metab.* **96**, E189–98 (2011).
- 1138 93. Nugent, S., Potvin, O., Cunnane, S. C., Chen, T.-H. & Duchesne, S.  
1139 Associating Type 2 Diabetes Risk Factor Genes and FDG-PET Brain  
1140 Metabolism in Normal Aging and Alzheimer’s Disease. *Front. Aging*  
1141 *Neurosci.* **12**, 580633 (2020).
- 1142 94. Baker, M. *et al.* Mutations in progranulin cause tau-negative frontotemporal  
1143 dementia linked to chromosome 17. *Nature* **442**, 916–919 (2006).
- 1144 95. Götzl, J. K. *et al.* Opposite microglial activation stages upon loss of PGRN or  
1145 TREM2 result in reduced cerebral glucose metabolism. *EMBO Mol. Med.* **11**,  
1146 e9711 (2019).
- 1147 96. Zhang, H. *et al.* The Retromer Complex and Sorting Nexins in  
1148 Neurodegenerative Diseases. *Front. Aging Neurosci.* **10**, 79 (2018).
- 1149 97. Höglinger, G. U. *et al.* Identification of common variants influencing risk of  
1150 the tauopathy progressive supranuclear palsy. *Nat. Genet.* **43**, 699–705 (2011).
- 1151 98. Kouri, N. *et al.* Genome-wide association study of corticobasal degeneration  
1152 identifies risk variants shared with progressive supranuclear palsy. *Nat.*

- 1153            *Commun.* **6**, 7247 (2015).
- 1154    99.    van Rheenen, W. *et al.* Genome-wide association analyses identify new risk  
1155            variants and the genetic architecture of amyotrophic lateral sclerosis. *Nat.*  
1156            *Genet.* **48**, 1043–1048 (2016).
- 1157    100.    Sproviero, W. *et al.* ATXN2 trinucleotide repeat length correlates with risk of  
1158            ALS. *Neurobiol. Aging* **51**, 178.e1-178.e9 (2017).
- 1159    101.    Schmiedel, B. J. *et al.* Impact of Genetic Polymorphisms on Human Immune  
1160            Cell Gene Expression. *Cell* **175**, 1701-1715.e16 (2018).
- 1161    102.    Schmiedel, B. J. *et al.* COVID-19 genetic risk variants are associated with  
1162            expression of multiple genes in diverse immune cell types. *Nat. Commun.* **12**,  
1163            6760 (2021).
- 1164    103.    Lavin, Y. *et al.* Tissue-resident macrophage enhancer landscapes are shaped by  
1165            the local microenvironment. *Cell* **159**, 1312–1326 (2014).
- 1166    104.    Francis, C. M. *et al.* Genome-wide associations of aortic distensibility suggest  
1167            causality for aortic aneurysms and brain white matter hyperintensities. *Nat.*  
1168            *Commun.* **13**, 4505 (2022).
- 1169    105.    Wagen, A. Z. *et al.* Life course, genetic, and neuropathological associations  
1170            with brain age in the 1946 British Birth Cohort: a population-based study.  
1171            *Lancet Heal. Longev.* **3**, e607-e616 (2022). doi:[https://doi.org/10.1016/S2666-](https://doi.org/10.1016/S2666-7568(22)00167-2)  
1172            [7568\(22\)00167-2](https://doi.org/10.1016/S2666-7568(22)00167-2).
- 1173    106.    de Magalhães, J. P. & Passos, J. F. Stress, cell senescence and organismal  
1174            ageing. *Mech. Ageing Dev.* **170**, 2–9 (2018).
- 1175    107.    de Leeuw, C. A., Mooij, J. M., Heskes, T. & Posthuma, D. MAGMA:  
1176            generalized gene-set analysis of GWAS data. *PLoS Comput. Biol.* **11**,  
1177            e1004219 (2015).

- 1178 108. Escott-Price, V. *et al.* Gene-Wide Analysis Detects Two New Susceptibility  
1179 Genes for Alzheimer’s Disease. *PLoS One* **9**, e94661 (2014).
- 1180 109. Love, M. I., Huber, W. & Anders, S. Moderated estimation of fold change and  
1181 dispersion for RNA-seq data with DESeq2. *Genome Biol.* **15**, 550 (2014).
- 1182 110. Langfelder, P., Luo, R., Oldham, M. C. & Horvath, S. Is my network module  
1183 preserved and reproducible? *PLoS Comput. Biol.* **7**, e1001057 (2011).
- 1184 111. Durinck, S., Spellman, P. T., Birney, E. & Huber, W. Mapping identifiers for  
1185 the integration of genomic datasets with the R/Bioconductor package biomaRt.  
1186 *Nat. Protoc.* **4**, 1184–1191 (2009).
- 1187 112. Qiu, X. *et al.* Single-cell mRNA quantification and differential analysis with  
1188 Census. *Nat. Methods* **14**, 309–315 (2017).
- 1189 113. Gusev, A. *et al.* Integrative approaches for large-scale transcriptome-wide  
1190 association studies. *Nat. Genet.* **48**, 245–252 (2016).
- 1191

| Module                            | MAGMA analysis |                     |              | Enrichment compared to random gene set by bootstrapping for genes p<0.01 association |         |
|-----------------------------------|----------------|---------------------|--------------|--------------------------------------------------------------------------------------|---------|
|                                   | Genes          | Competitive p value | Self P value | Genes                                                                                | P value |
| Human bulk Microglial             | 434            | 0.023               | 3.11e-6      | 26                                                                                   | 1e-5    |
| Human bulk Oligodendrocytic       | 780            | 0.406               | 0.018        | 29                                                                                   | 0.033   |
| Mouse bulk Microglial             | 240            | 0.064               | 0.002        | 9                                                                                    | 0.160   |
| Mouse bulk Ribosomal              | 333            | 0.429               | 0.007        | 9                                                                                    | 0.515   |
| Mouse bulk Mitochondrial          | 396            | 0.711               | 0.108        | 5                                                                                    | 0.975   |
| Mouse bulk Oligodendrocytic       | 236            | 0.989               | 0.836        | 3                                                                                    | 0.943   |
| Mouse single-cell Interferon      | 308            | 0.045               | 0.003        | 10                                                                                   | 0.28    |
| Mouse single-cell ARM             | 499            | 0.503               | 0.001        | 17                                                                                   | 0.067   |
| Mouse single-cell Phagolysosomal  | 1337           | 0.608               | 0.002        | 45                                                                                   | 0.054   |
| Mouse single-cell HM2 Homeostatic | 964            | 0.533               | 0.003        | 28                                                                                   | 0.329   |

1193

1194

1195

1196

**Table 1. Test of enrichment of age-dependent gene modules with genes variants associated with Alzheimer's disease from GWAS of Kunkle *et al.* (2019)<sup>21</sup>.** Gene modules from mouse hippocampus bulk RNA-seq (Fig. 1), mouse hippocampus scRNA-seq (Fig. 2, 3), and human hippocampus bulk RNA-seq (Fig. 5). ARM, activated response microglia. HM2, homeostatic microglial subcluster 2.

| Module                            | MAGMA analysis |                     |              | Enrichment compared to random gene set by bootstrapping for genes p<0.01 association |         |
|-----------------------------------|----------------|---------------------|--------------|--------------------------------------------------------------------------------------|---------|
|                                   | Genes          | Competitive p value | Self P value | Genes                                                                                | P value |
| Human bulk Microglial             | 423            | 0.982               | 0.539        | 12                                                                                   | 0.806   |
| Human bulk Oligodendrocytic       | 764            | 0.871               | 0.106        | 21                                                                                   | 0.804   |
| Mouse bulk Microglial             | 238            | 0.507               | 0.107        | 7                                                                                    | 0.671   |
| Mouse bulk Ribosomal              | 321            | 0.510               | 0.002        | 12                                                                                   | 0.472   |
| Mouse bulk Mitochondrial          | 389            | 0.163               | 3.00e-4      | 11                                                                                   | 0.801   |
| Mouse bulk Oligodendrocytic       | 235            | 0.776               | 0.103        | 7                                                                                    | 0.638   |
| Mouse single-cell Interferon      | 305            | 0.284               | 0.056        | 10                                                                                   | 0.553   |
| Mouse single-cell ARM             | 487            | 0.721               | 0.478        | 9                                                                                    | 0.969   |
| Mouse single-cell Phagolysosomal  | 1310           | 0.759               | 2.88e-5      | 49                                                                                   | 0.146   |
| Mouse single-cell HM2 Homeostatic | 936            | 0.734               | 0.037        | 39                                                                                   | 0.032   |

1198  
1199  
1200  
1201  
1202  
1203

**Table 2. Test of enrichment of age-dependent gene modules with genes variants associated with ageing from GWAS of Timmers *et al.* (2020)<sup>10</sup>.** Gene modules from mouse hippocampus bulk RNA-seq (Fig. 1), mouse hippocampus scRNA-seq (Fig. 2, 3), and human hippocampus bulk RNA-seq (Fig. 5). ARM, activated response microglia. HM2, homeostatic microglial subcluster 2.



1204 **Figures**

1205

1206 **Figure 1. Gene co-expression modules enriched for microglial and**  
1207 **oligodendrocytic genes are significantly associated with age in the mouse**  
1208 **hippocampus.** A) Co-expression analysis of bulk RNA-seq of the mouse  
1209 hippocampus produced eight gene modules with significant correlation to age using  
1210 our Mouseac data<sup>24</sup>. Pearson's product-moment correlation with age, value given in  
1211 each cell where  $R^2 > 0.4$ , \*\*  $p < 0.01$ , \*\*\*  $p < 0.001$ . No module has a significant  
1212 association with either sequencing batch or lane, validating our batch correction  
1213 strategy. B) Cell-type enrichment analysis reveals a significant enrichment of  
1214 microglial genes in the microglial module, oligodendrocyte genes in the  
1215 oligodendrocytic module, and dopaminergic neuron genes in the brown module. \*  
1216  $p < 0.05$ , \*\*  $p < 0.01$ , \*\*\*  $p < 0.001$ . C) Network plot of the 151 most connected genes  
1217 in the microglial module (left). Hub genes are shown in red. Biological annotations  
1218 (right). D) Network plot of the 152 most connected genes in the oligodendrocytic  
1219 module (left). Hub genes are shown in red. Biological annotations (right). Full  
1220 networks given in Supplementary Table 10 and 11.

1221

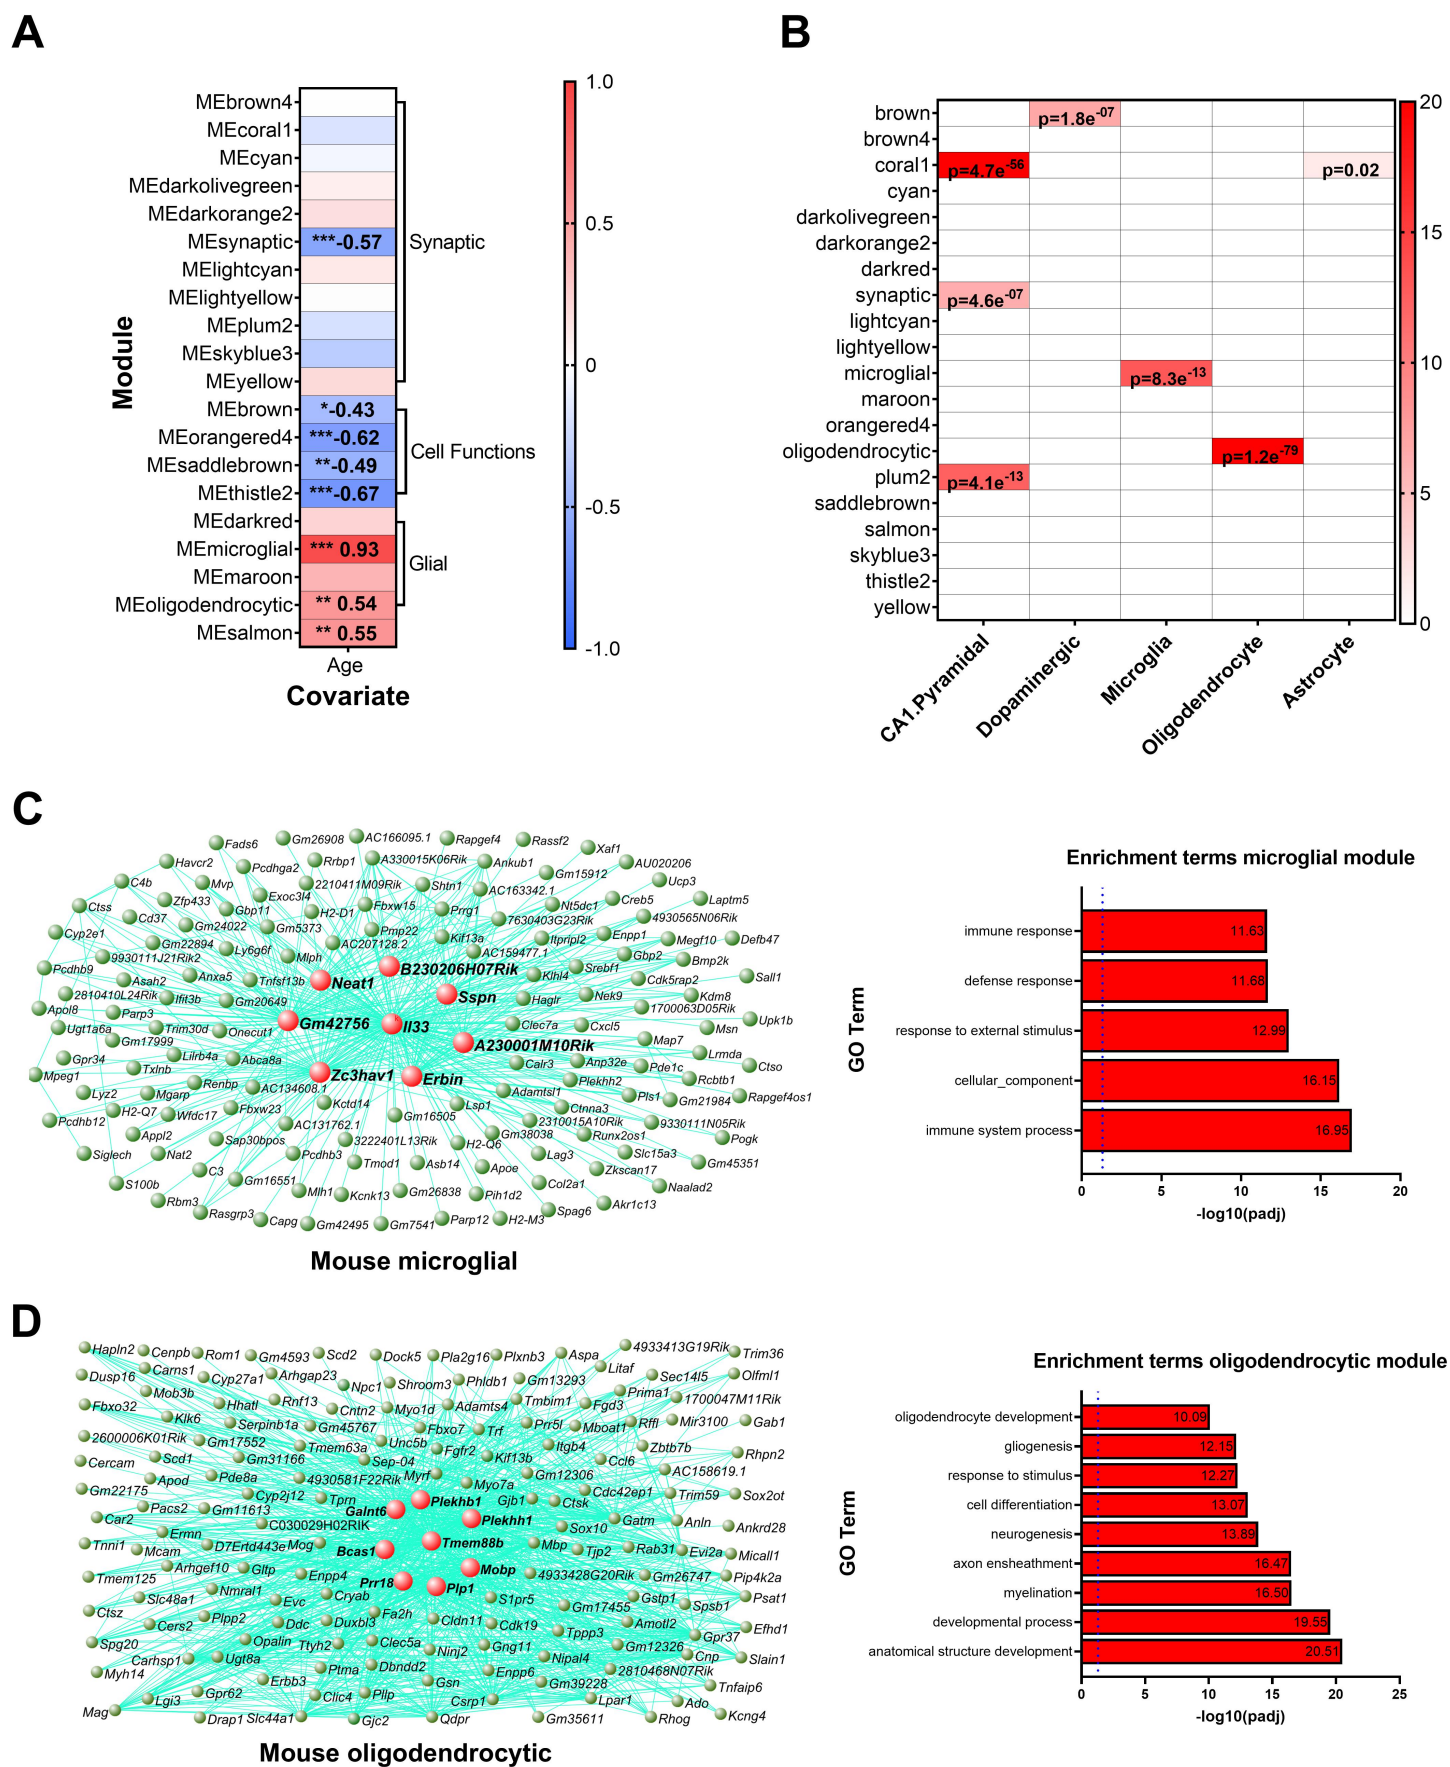

**Figure 1**

1243 **Figure 2. Five gene co-expression modules expressed by distinct microglial**  
1244 **subpopulations are dysregulated with age in the mouse hippocampus. A)**  
1245 Association,  $p(-\log_{10})$ , between the expression of co-expression modules formed by  
1246 co-expression analysis of data generated by scRNA-seq of microglia (Mg) isolated  
1247 from wild-type mice at 3, 6, 12, and 21 months-of-age, and female sex, sequencing  
1248 plate, and six microglial subpopulations identified by the original authors<sup>34</sup>.  
1249 Subpopulations: HM1 – Homeostatic Microglia 1, HM2 – Homeostatic Microglia 2,  
1250 TRM –Transiting Microglia, ARM – Activated Response Microglia, IRM – Interferon  
1251 Response Microglia. Negative  $p(-\log_{10})$  indicates a negative association. B)  
1252 Pseudotime analysis with Monocle 2 identified a bifurcating trajectory, with HM1 as  
1253 a root state and ARM and IRM as two terminal states. C,E,G,I,K,M). Expression of  
1254 the differentially expressed genes in the ARM-associated (C), interferon (E),  
1255 Ribosomal (G), HM2-associated (I), HM1-associated (K), and TGF- $\beta$  (M) co-  
1256 expression modules shown along this Pseudotime trajectory. D,F,H,J,L,N)  
1257 Comparison of expression of the 100 most central genes (as a proxy for module  
1258 expression) from the ARM-associated (D), interferon (F), ribosomal (H), HM2-  
1259 associated (J), HM1-associated (L), and TGF- $\beta$  (N) modules in microglia isolated  
1260 from the mouse hippocampus at 6-8 and 16-18 months-of-age and profiled by RNA-  
1261 seq<sup>35</sup>.  
1262  
1263  
1264  
1265  
1266  
1267

**A**

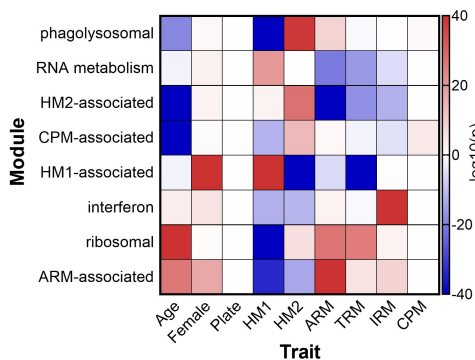

**B**

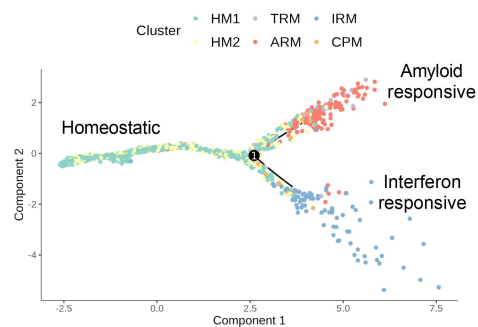

**C**

**ARM-associated module expression along activation trajectory**

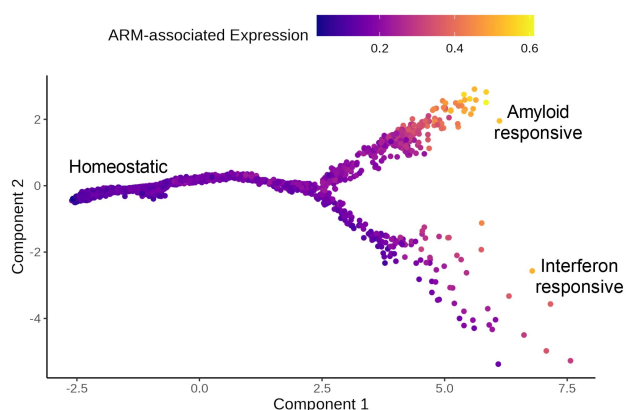

**D**

**ARM-associated module expression in aged microglia**

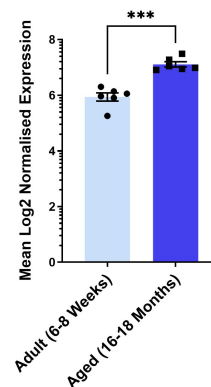

**E**

**Interferon module expression along activation trajectory**

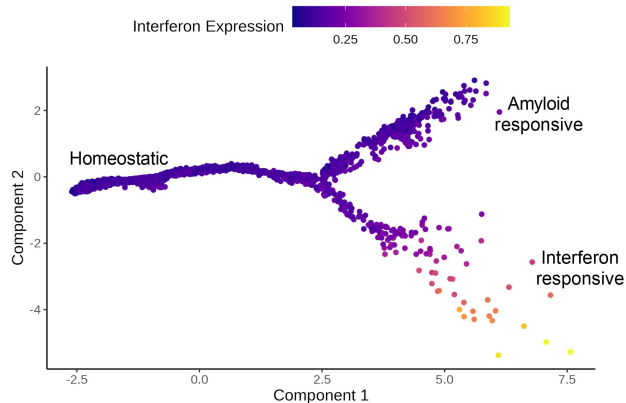

**F**

**Interferon module expression in aged microglia**

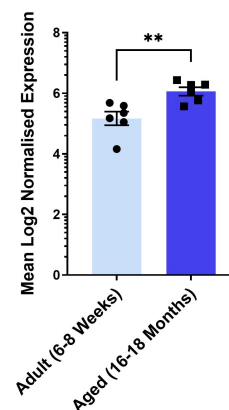

**G**

**Ribosomal module expression along activation trajectory**

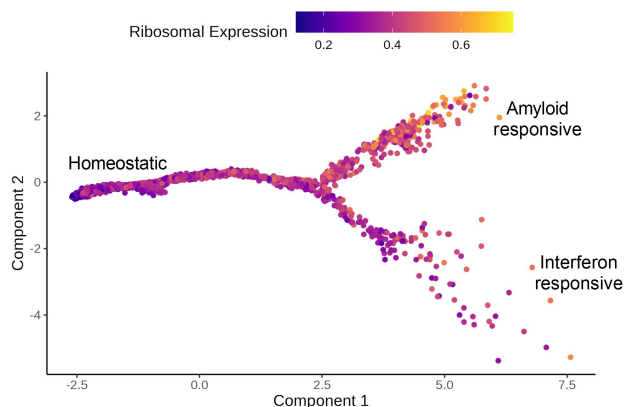

**H**

**Ribosomal module expression in aged microglia**

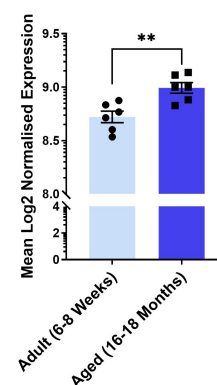

**Figure 2**

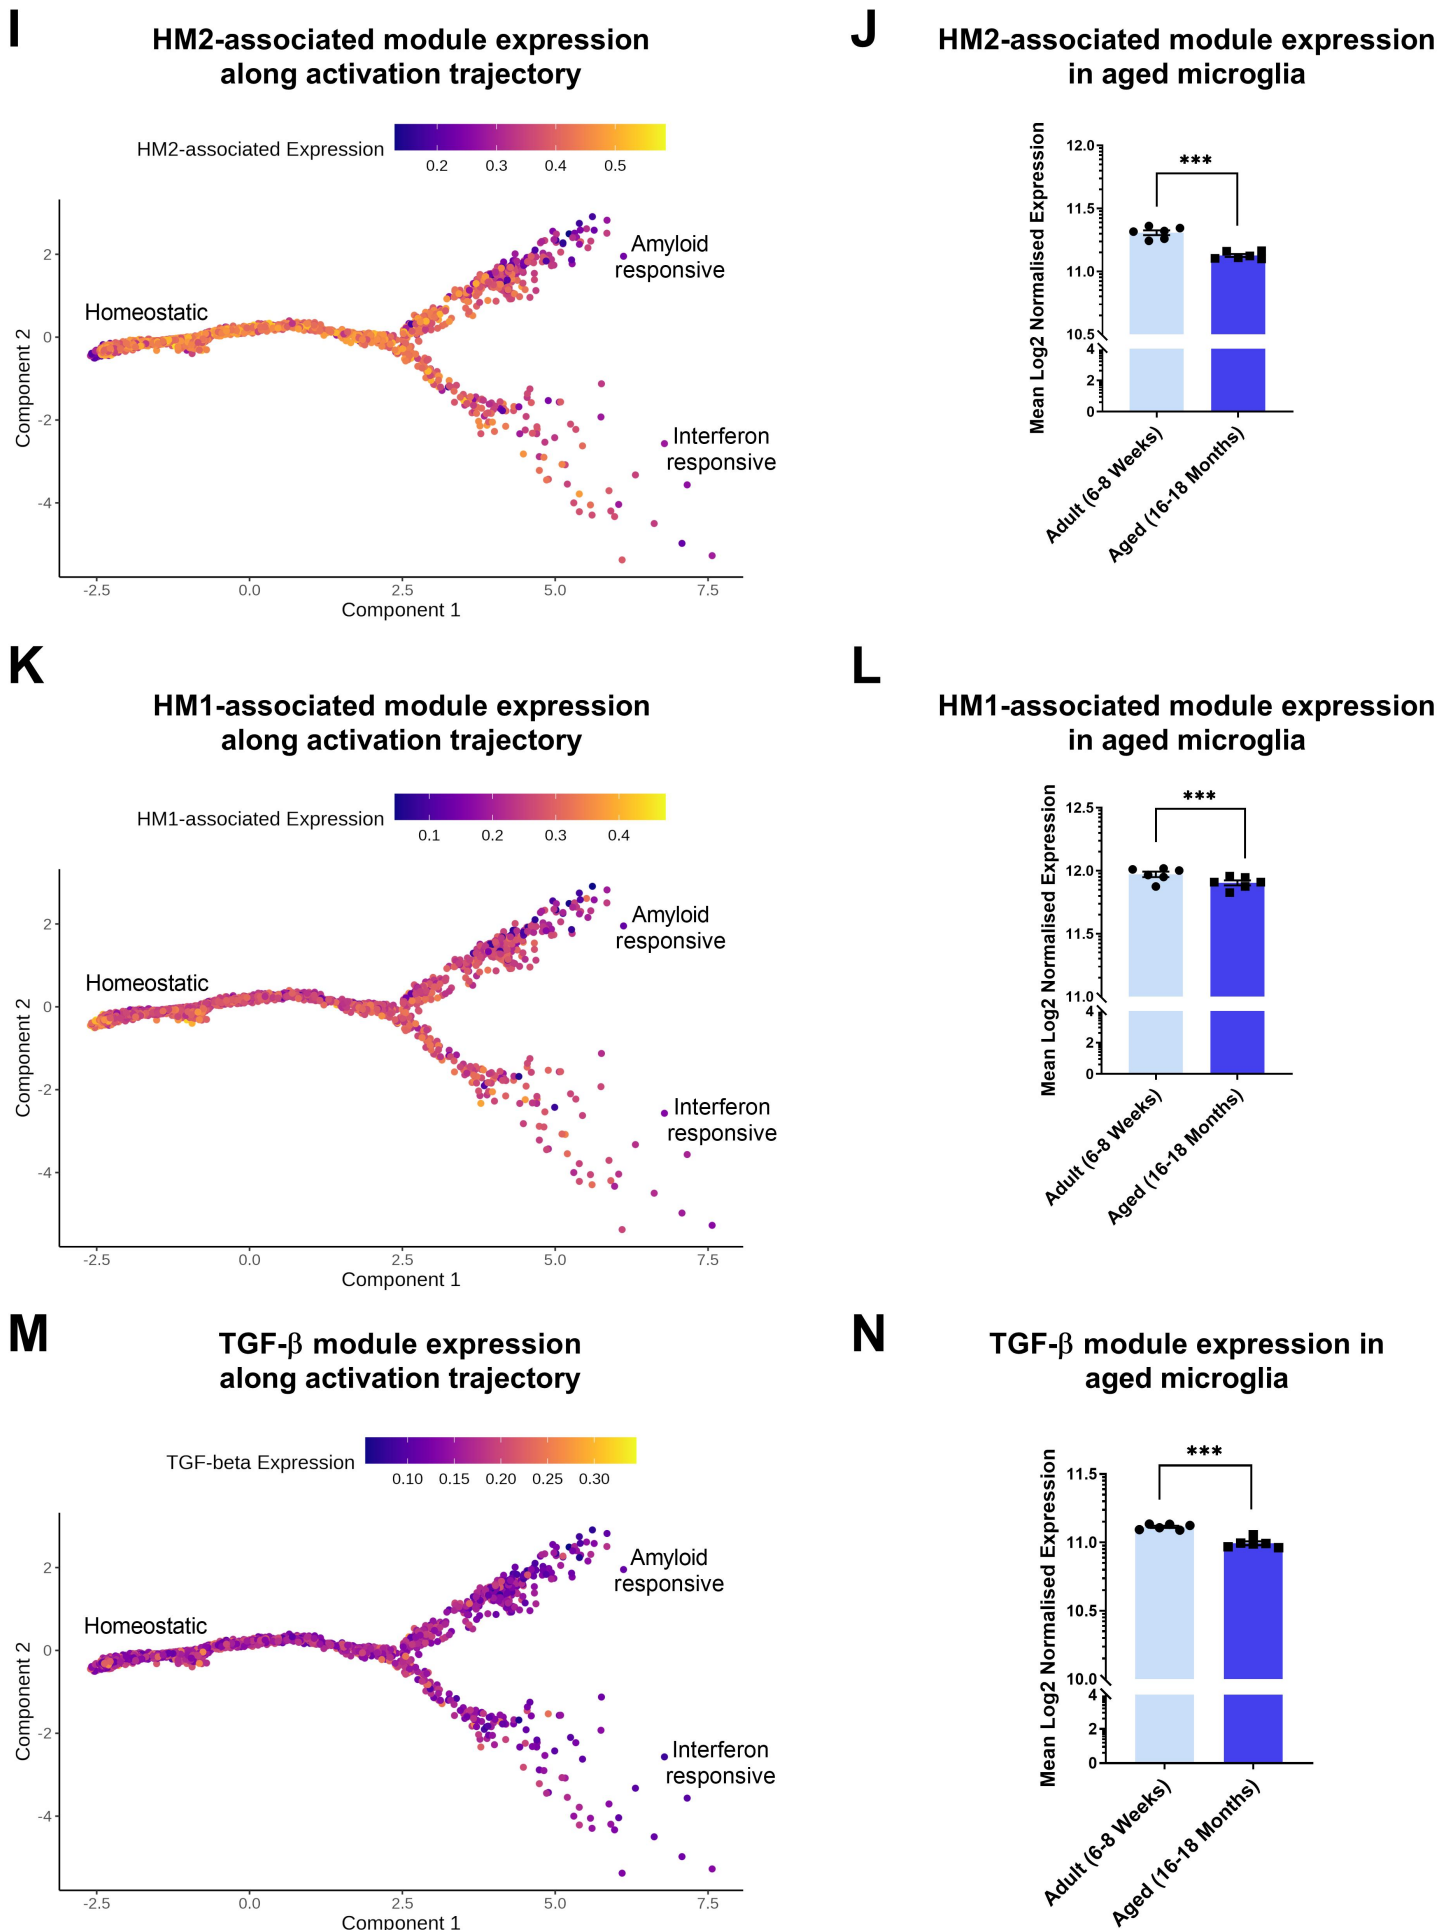

**Figure 2 cont**

1317 **Figure 3. Gene co-expression networks from microglia analysed by scRNA-seq**  
1318 **associated with ageing.** The genetic networks from microglial cells isolated from  
1319 wild-type mice at 3, 6, 12 and 21 months-of-age analysed by scRNA-seq<sup>34</sup>. Network  
1320 plot of the 45 most connected genes in the ARM-associated (A), interferon (B), HM2-  
1321 associated (C), and phagolysosomal (D), modules. Green nodes represent genes, edge  
1322 lines represent co-expression connections, and the central large red nodes are the hub  
1323 genes. Full networks given in Supplementary Table 12, 13, 14 and 15.

1324

1325

1326

1327

1328

1329

1330

1331

1332

1333

1334

1335

1336

1337

1338

1339

1340

1341



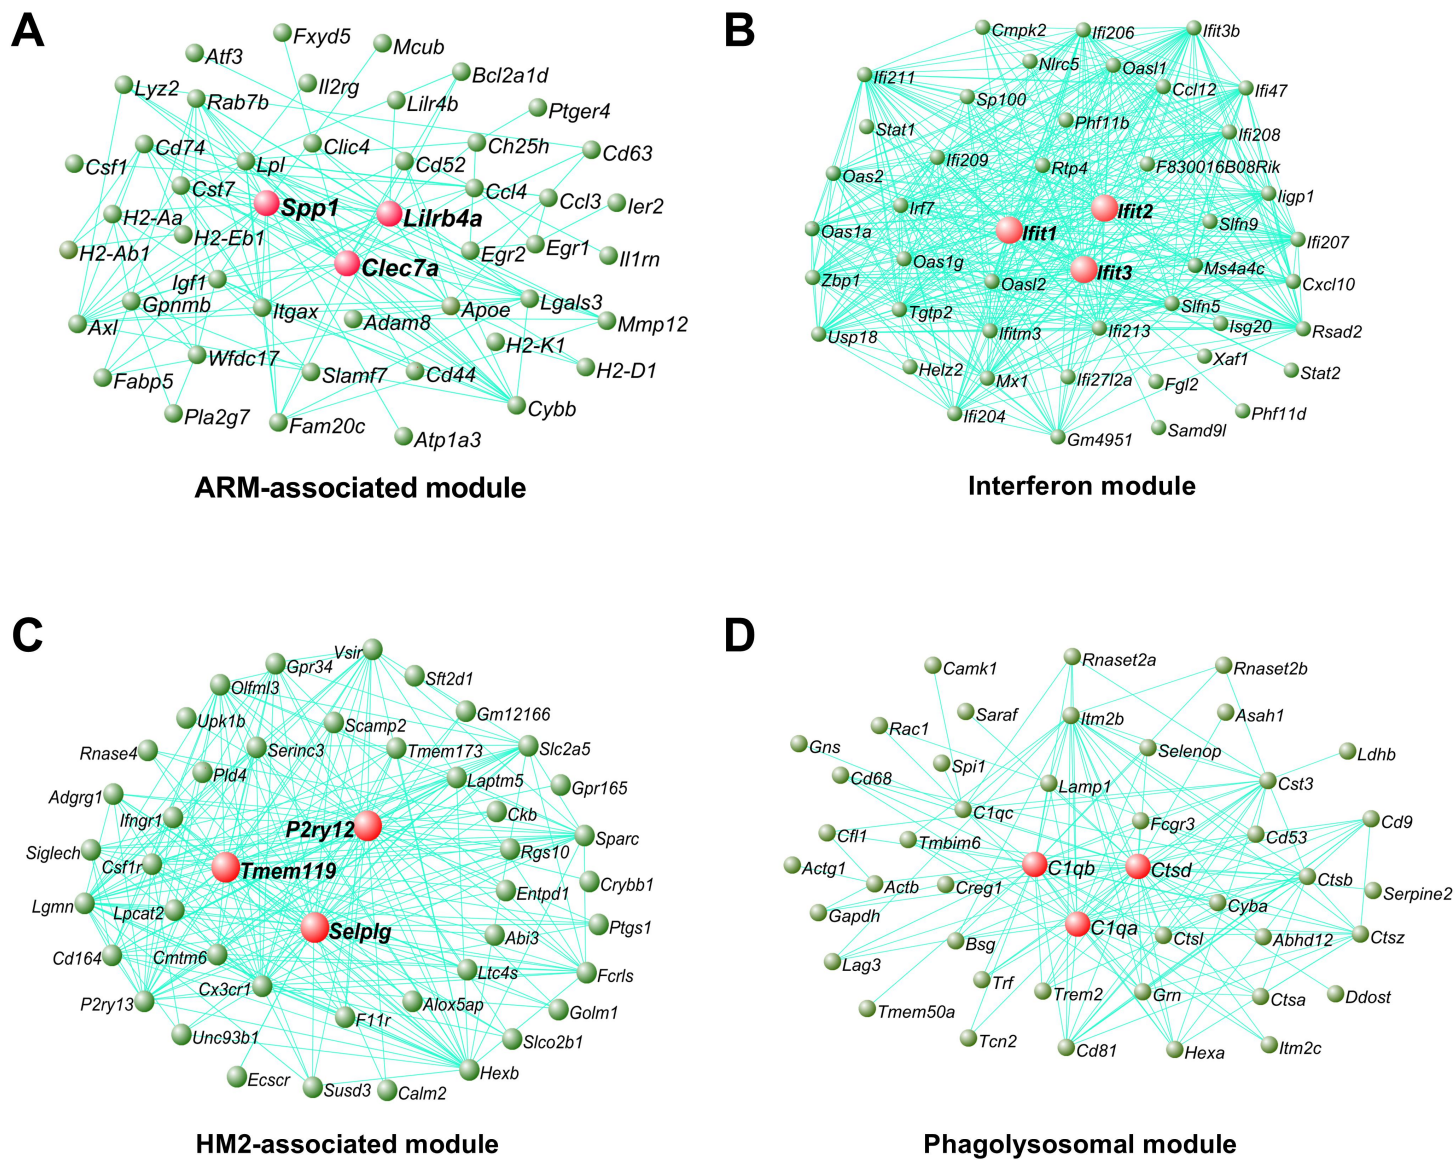

**Figure 3**

1366 **Figure 4. Gene co-expression network changes in microglia isolated from mice**  
1367 **treated with cuprizone and analysed using scRNA-seq.** A) Preservation analysis of  
1368 age-related modules in a dataset generated by scRNA-seq of microglia isolated from  
1369 the corpus callosum of 9-11 month old WT mice fed a control or demyelinating  
1370 cuprizone diet for 5- or 12-weeks<sup>40</sup>. Control module represents results for randomly  
1371 chosen genes of a similar module size. B-F) Comparison of expression of the 100  
1372 most central genes (as a proxy of module expression) from the ARM-associated (B),  
1373 interferon (C), ribosomal (D), HM2-associated (E), HM1-associated (F), and TGF- $\beta$   
1374 (G) modules in microglia isolated from the corpus callosum fed a control diet or a  
1375 demyelinating cuprizone diet for 5- or 12-weeks and profiled by bulk RNA-seq<sup>40</sup>.  
1376  
1377  
1378  
1379  
1380  
1381  
1382  
1383  
1384  
1385  
1386  
1387  
1388  
1389  
1390



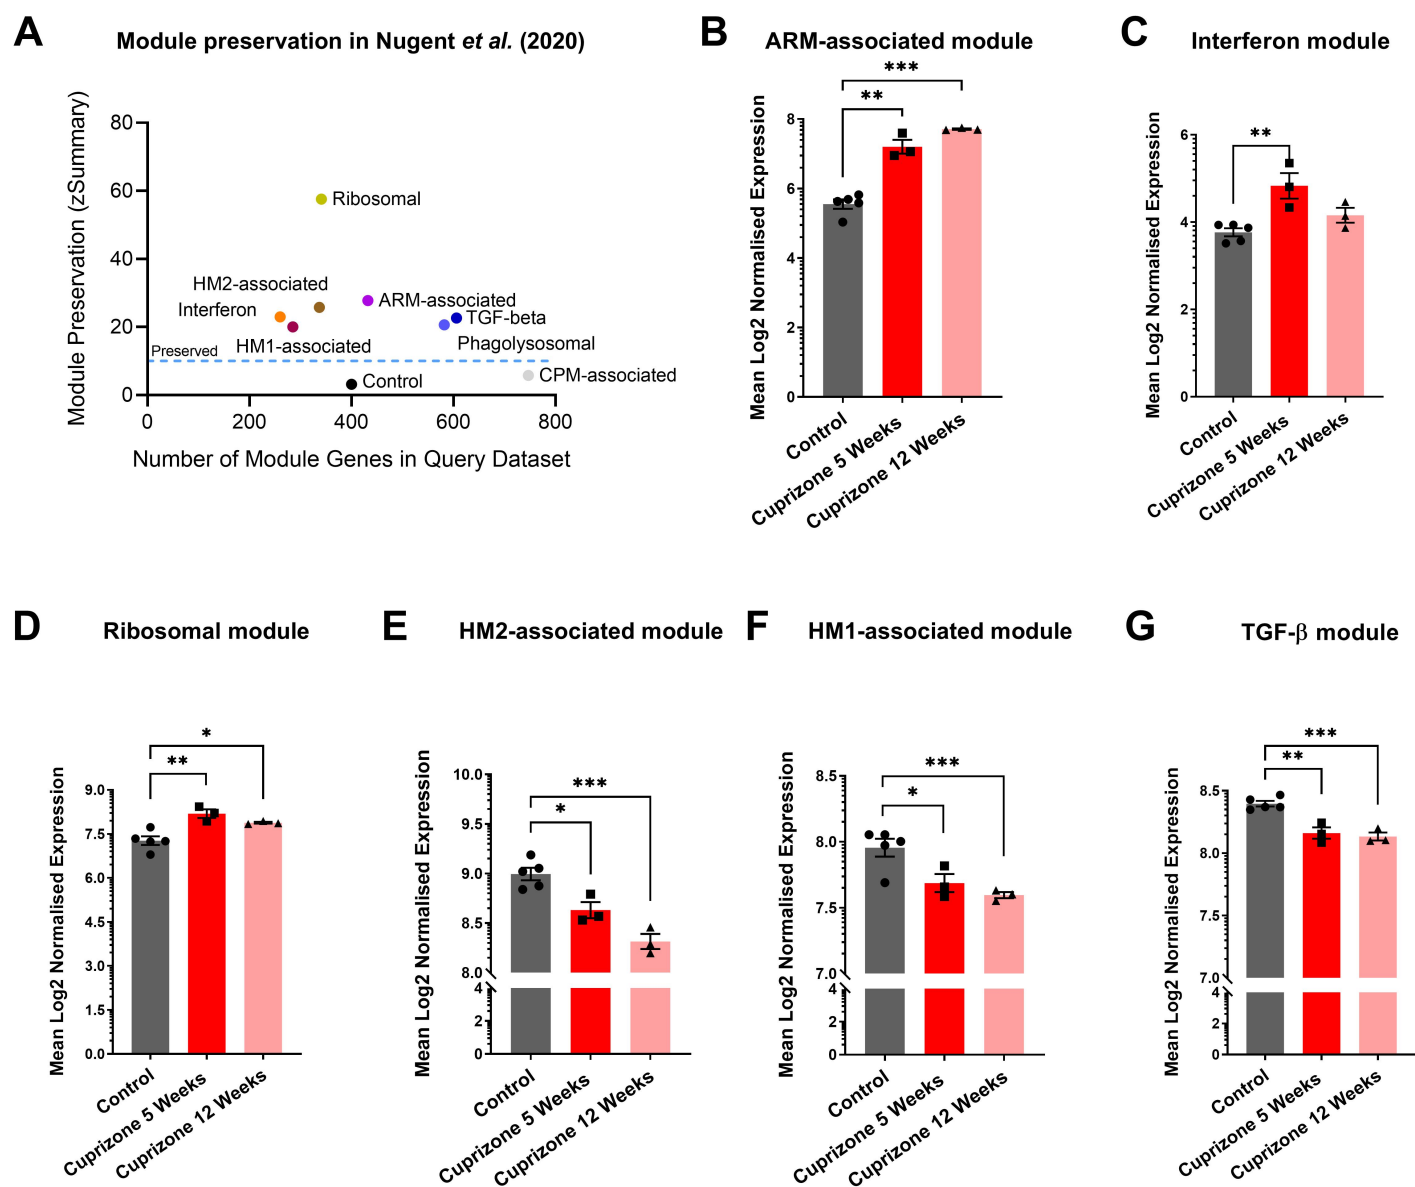

**Figure 4**

1416 **Figure 5. Co-expression analysis of the human hippocampus reveals aspects of**  
1417 **ageing preserved in mice and aspects unique to humans.** A) Co-expression  
1418 analysis produced seventeen gene modules whose expression significantly correlates  
1419 to age in the human hippocampus (correlation>0.4), from the GTEx data<sup>43,49</sup>. \*\*\*  
1420 p<0.001. B) Network diagram of the most central 152 genes from the human  
1421 microglial network. C) Network diagram of the most central 150 genes from the  
1422 human oligodendrocytic network. D) Mouse co-expression modules are generally  
1423 moderately preserved in humans. Therefore, it appears only subsections of the mouse  
1424 gene networks are preserved in humans. Human GTEx co-expression module  
1425 preservation in mouse data (left), and mouse co-expression module preservation in  
1426 human GTEx RNA-seq data (right). z.summary is an amalgamation of other  
1427 preservation statistics (z.density, mean connection strength per gene, and  
1428 z.connectivity, sum of all connections), found to depict module preservation better  
1429 than these statistics alone or simple gene overlap measures<sup>110</sup>. Human data was  
1430 compared to our Mouseac data<sup>24</sup>. Full networks given in Supplementary Table 16 and  
1431 17.  
1432  
1433  
1434  
1435  
1436  
1437  
1438  
1439  
1440

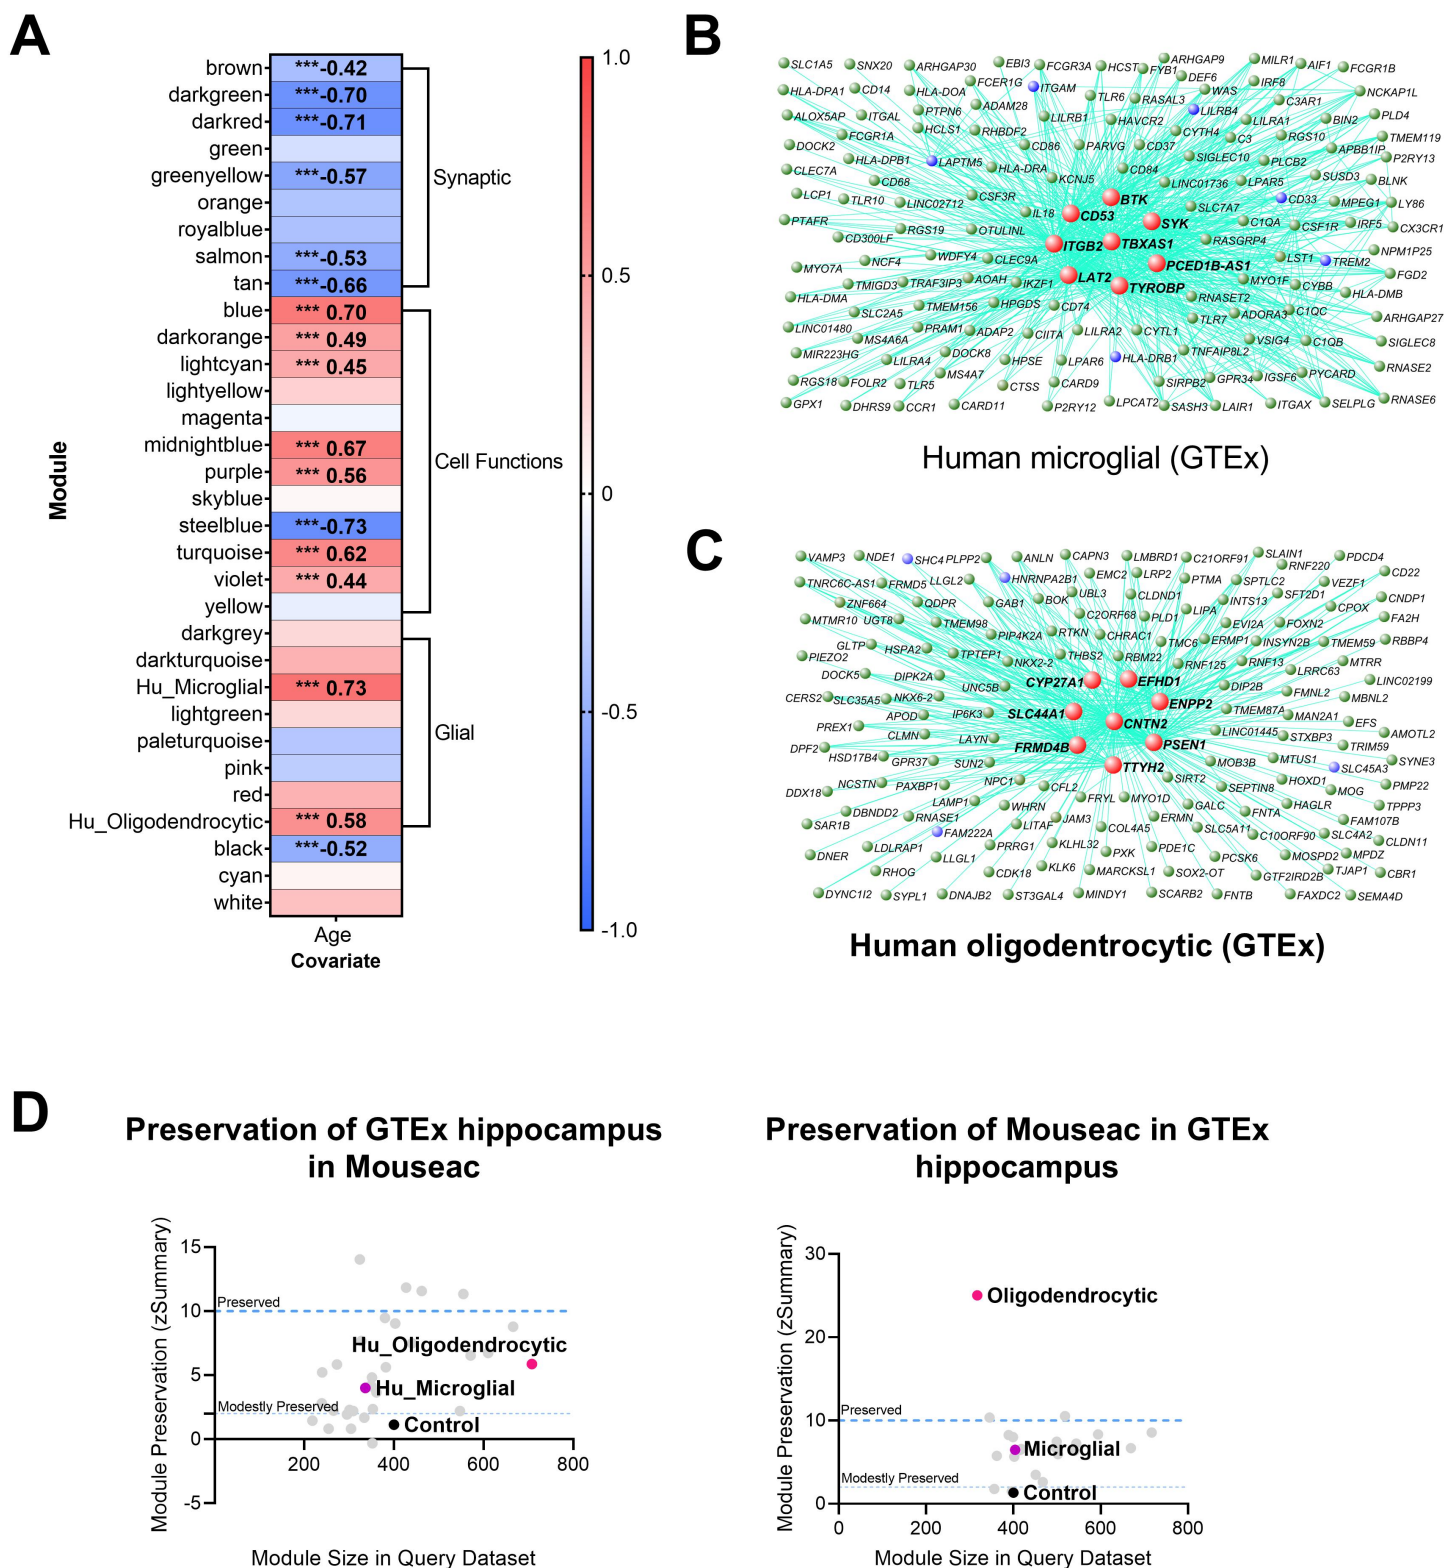

**Figure 5**

1466 **Figure 6. Manhattan plots of TWAS results identifying genes whose expression is**  
1467 **associated with longevity in whole blood, CD14+ve myeloid cells, cortex and**  
1468 **hippocampus.** The y axis is the Z-score of the association between gene expression  
1469 and longevity in whole blood from YFS study<sup>50</sup> (A), brain cortex from the GTEx  
1470 Project<sup>43,49</sup> (B), naïve (CD14) monocytes from the Fairfax dataset<sup>48</sup> (C), and  
1471 hippocampus from the GTEx Project<sup>43,49</sup> (D). Genes that showed significant  
1472 association following Bonferroni correction for multiple testing are shown with red  
1473 (ageing risk genes).

1474

1475

1476

1477

1478

1479

1480

1481

1482

1483

1484

1485

1486

1487

1488

1489

1490

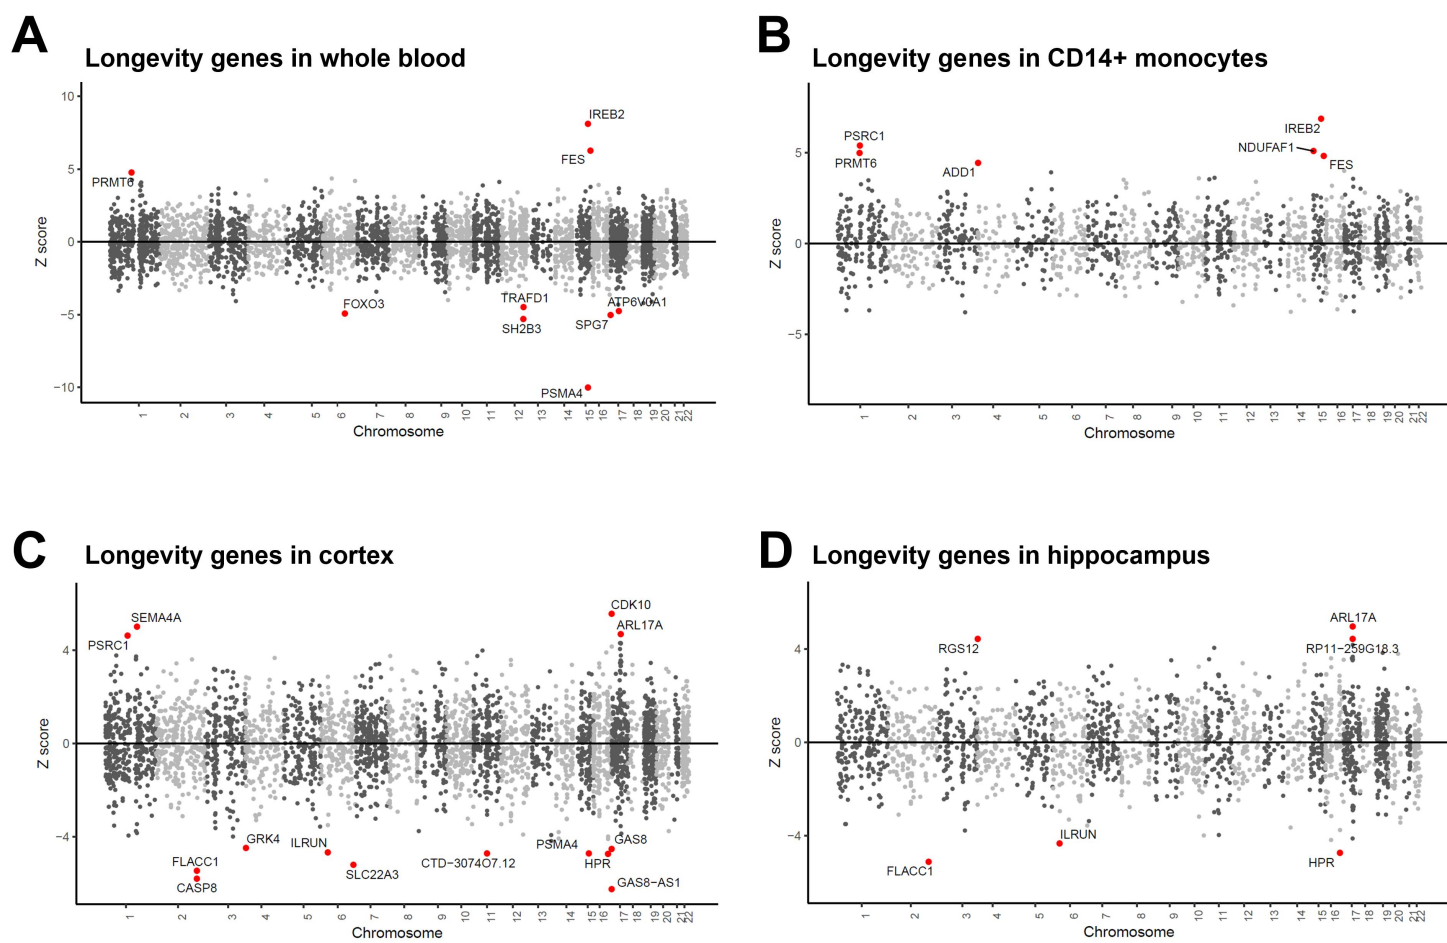

**Figure 6**

1516 **Figure 7. Ingenuity plot showing the TWAS hits associated with longevity are**  
1517 **linked in a network containing *APOE*.** Solid lines indicate direct interactions (*e.g.*  
1518 protein-protein interactions, or phosphorylation), and broken lines indirect  
1519 interactions, between pairs of genes across all mammalian species for tissues and cell  
1520 types curated in Ingenuity (QIAGEN). Longevity-associated genes from TWAS used  
1521 as input ( $p < 0.01$  and  $Z > 2.5$  or  $< -2.5$ ; Supplementary Table 9). Default settings  
1522 used.

1523

1524

1525

1526

1527

1528

1529

1530

1531

1532

1533

1534

1535

1536

1537

1538

1539

1540

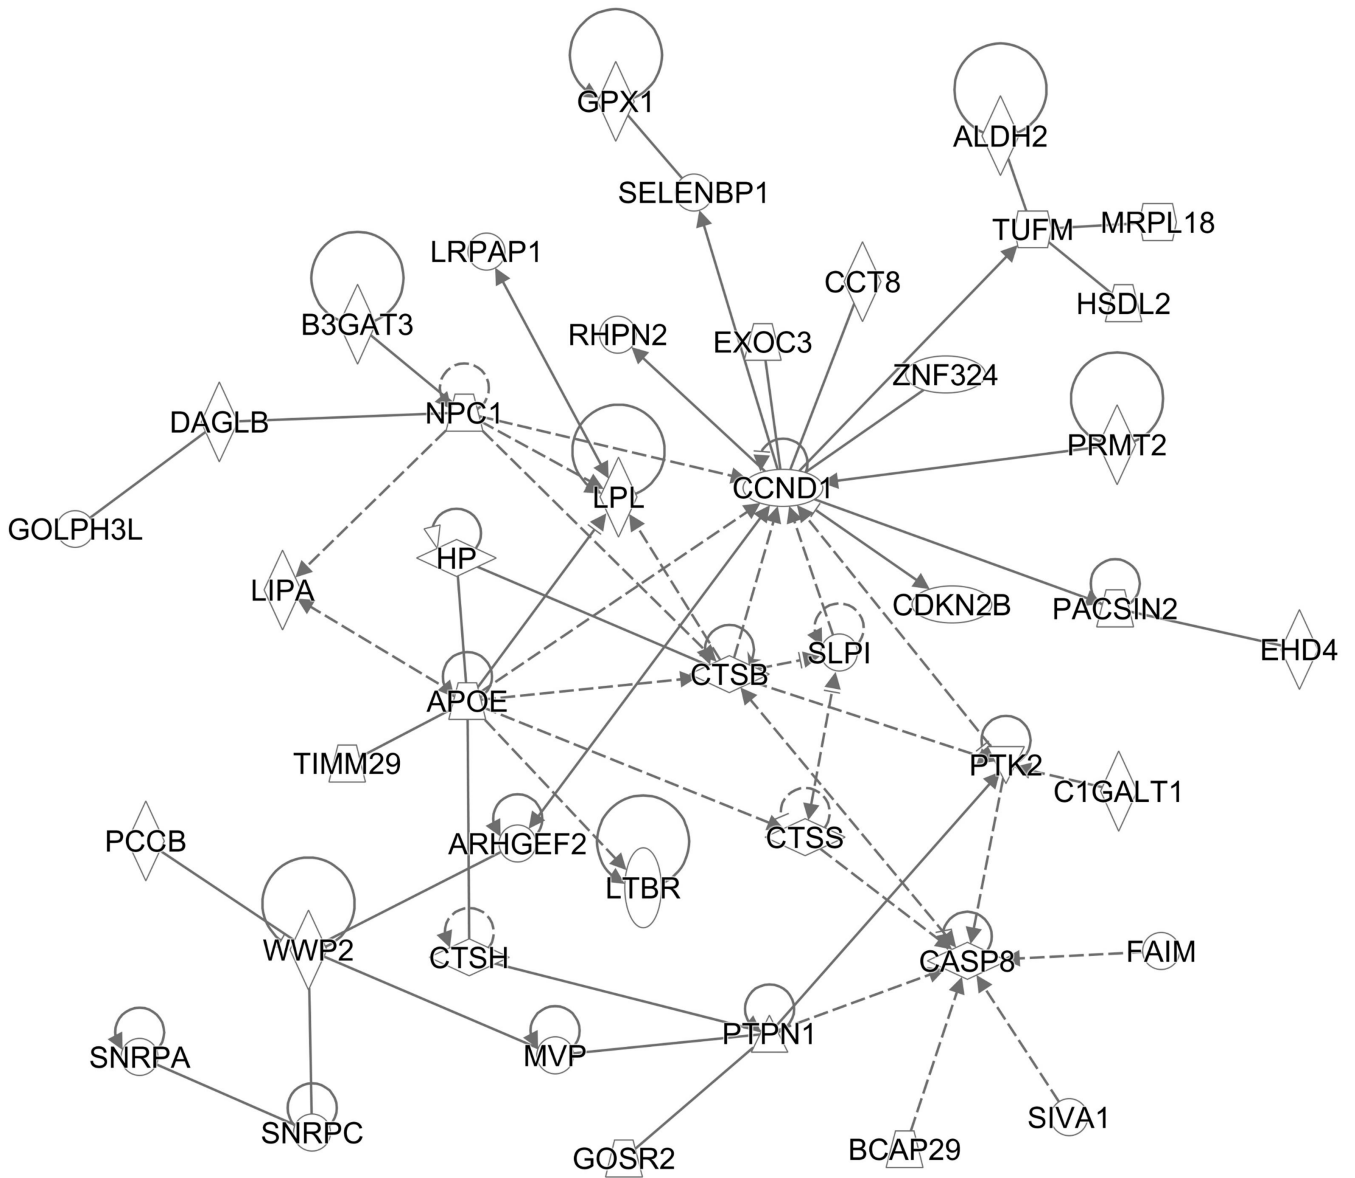

**Figure 7**



1565 **Figure 8. Hypothesis for regulation of homeostatic microglia by genes associated**  
1566 **with longevity, and on the other side regulation of microglial activity and**  
1567 **oligodendrocyte function by genes associated with AD-risk.** Our data suggest a  
1568 model whereby genes associated with longevity are involved in the homeostatic  
1569 functions of microglia, and perhaps other innate immune cells, and that if these  
1570 immune cells escape this state of homeostasis by activating stimuli such as amyloid  
1571 pathology and age-dependent myelin fragmentation, then genes associated with AD  
1572 determine how microglia are activated and how microglia interact with remyelinating  
1573 oligodendrocytes. The age-associated genes we identified in this study that putatively  
1574 drive the genetic networks associated with innate immune homeostatic processes and  
1575 activation may underlie “inflammageing.”

1576

1577

1578

1579

1580

1581

1582

1583

1584

1585

1586

1587

1588

1589



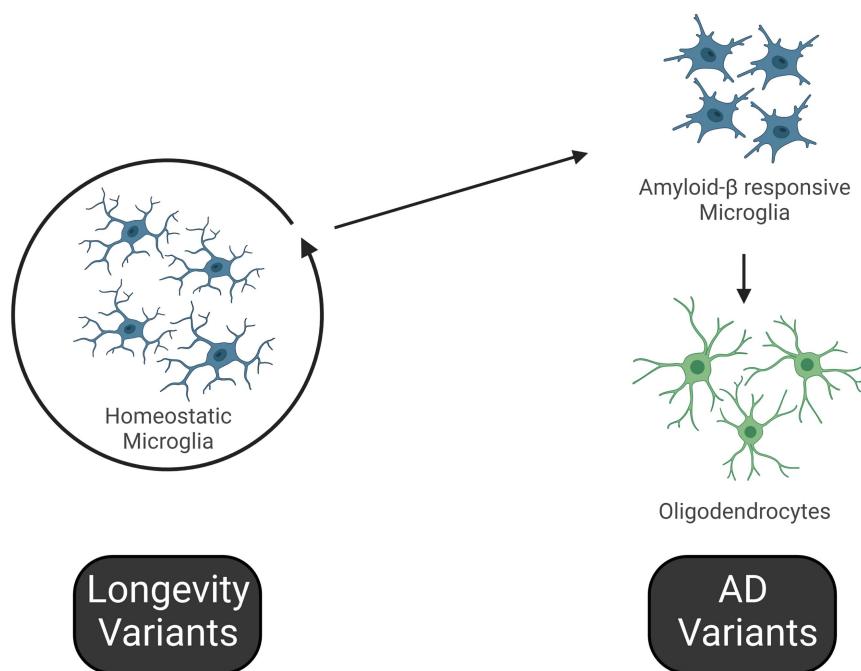

**Figure 8**
